# Supplementary material for: LC-MS Metabolite Profiling and the Hypoglycemic Activity of Morus alba L. Extracts
Source: MDPI journal article supplement (doi:10.3390/molecules27175360), 2022-08-23
Supplement: s1 [file s1]

---

*Supplementary Materials*

# LC-MS Metabolite Profiling and the Hypoglycemic Activity of *Morus alba* L. Extracts

Qing Yi-Jun Zhou <sup>1,2</sup>, Xin Liao <sup>2</sup>, Hao-Ming Kuang <sup>2</sup>, Jia-Yu Li <sup>2</sup> and Shui-Han Zhang <sup>1,2,\*</sup>

<sup>1</sup> Science and Technology Innovation Center, Hunan University of Chinese Medicine, 410208 Changsha, China

<sup>2</sup> Institute of Chinese Materia Medica, Hunan Academy of Chinese Medicine, 410013 Changsha, China

\* Correspondence: zhangshuihan0220@126.com; Tel.: +86-731-84686656

Figure. S1 the MS/MS spectra of compounds 1–60.

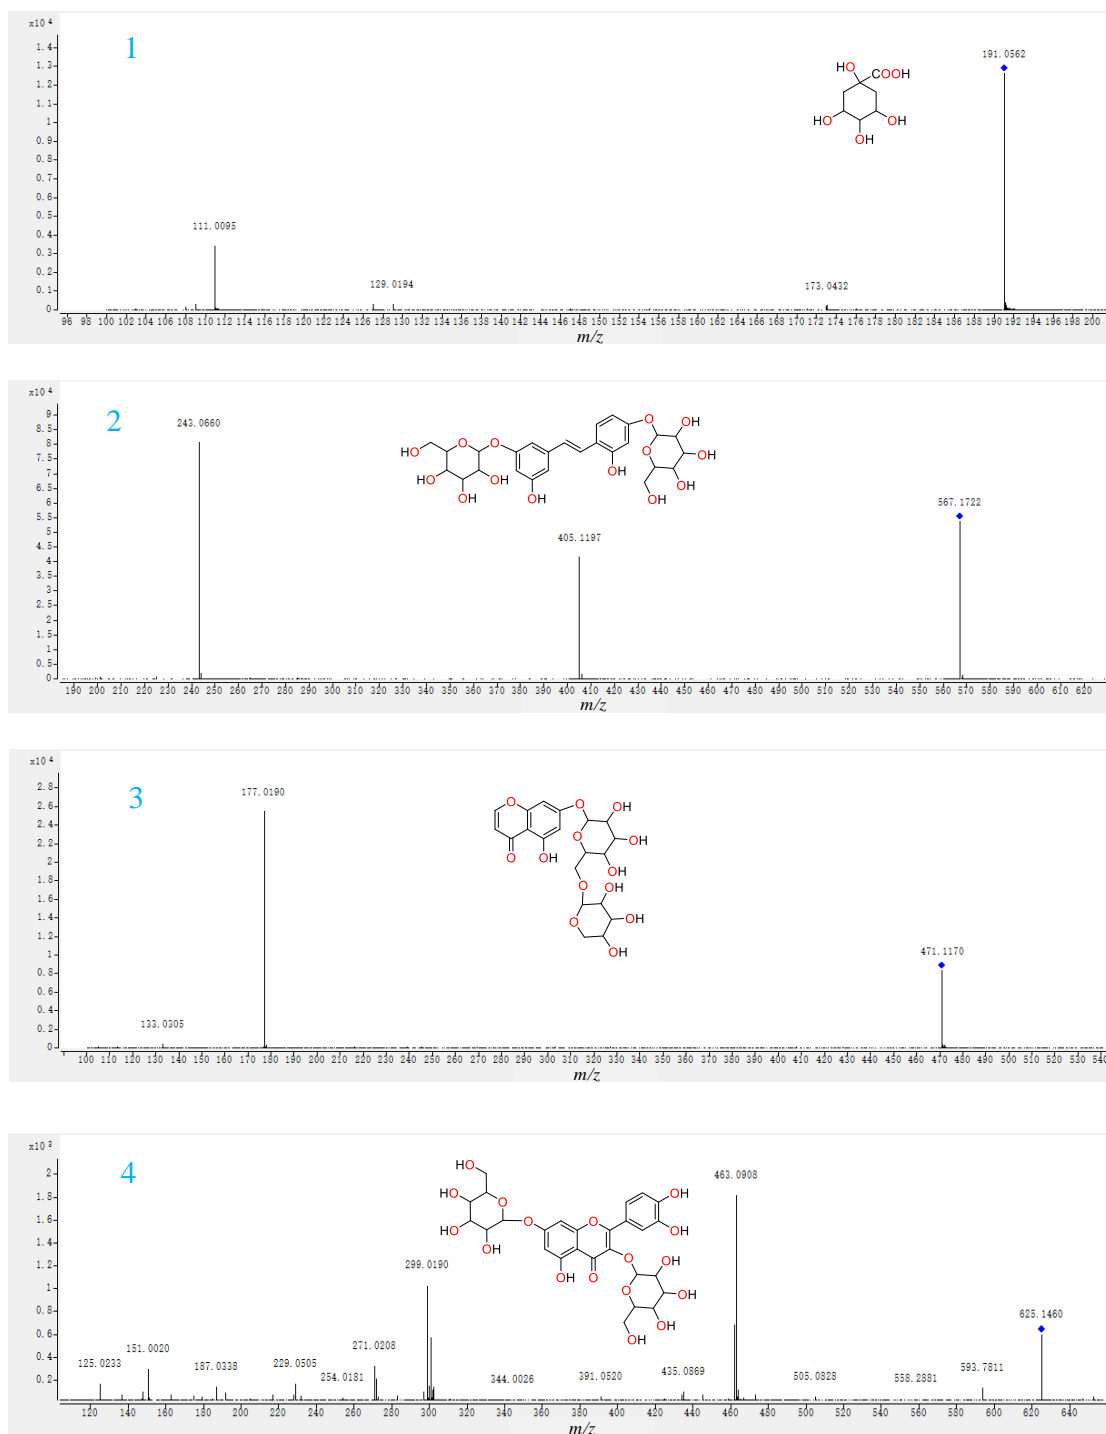

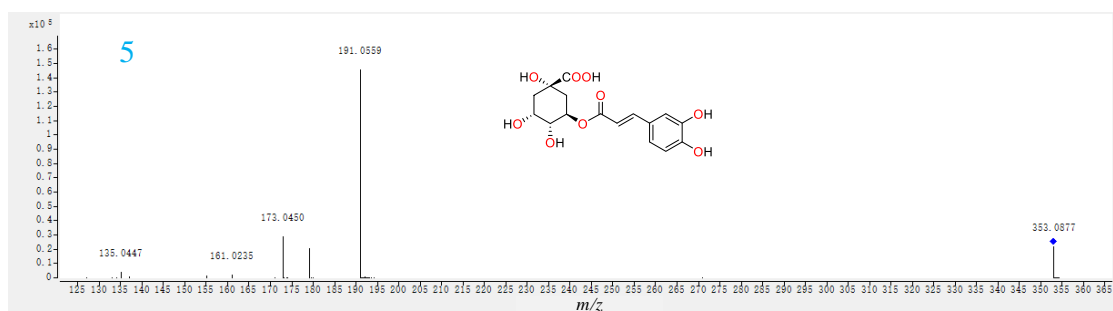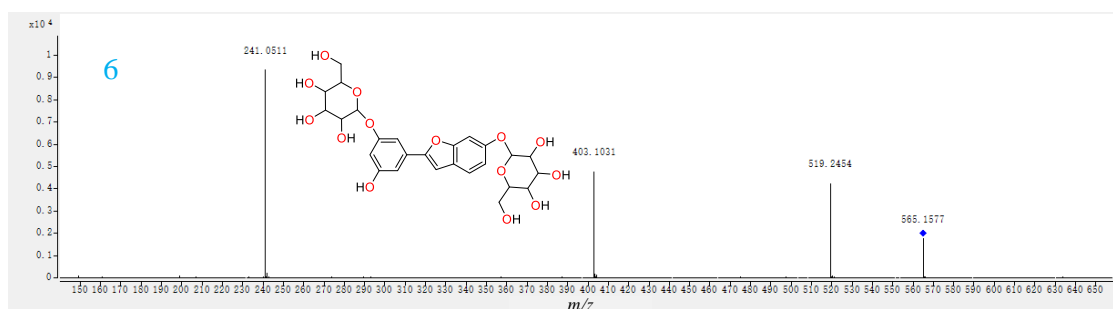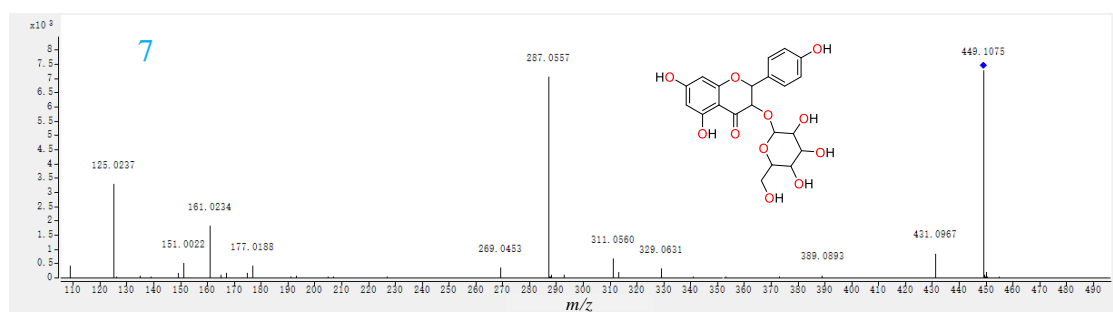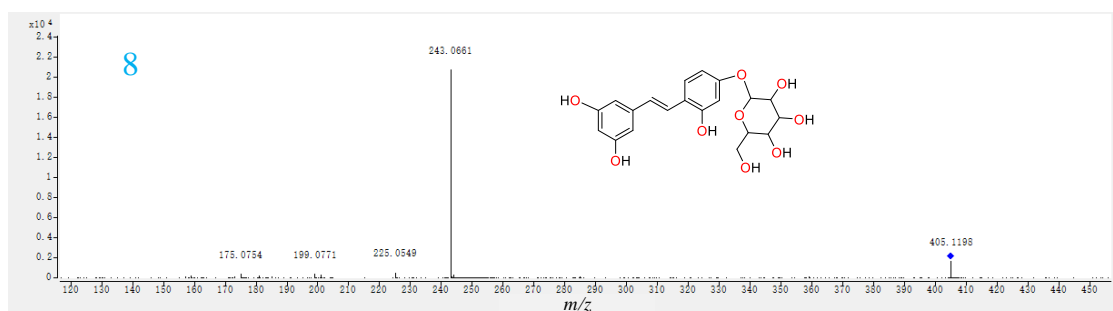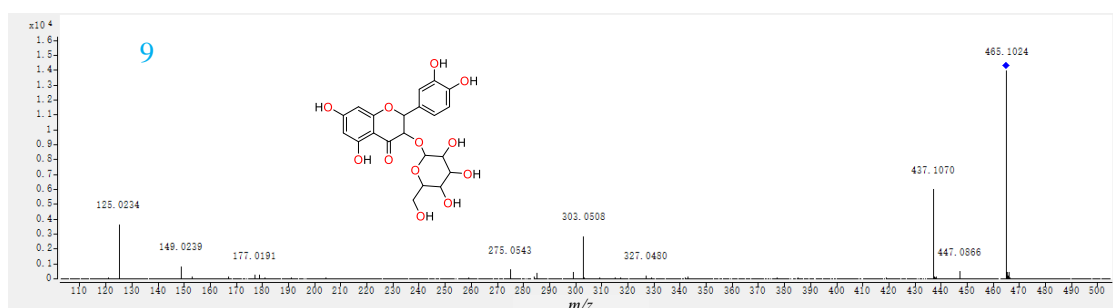

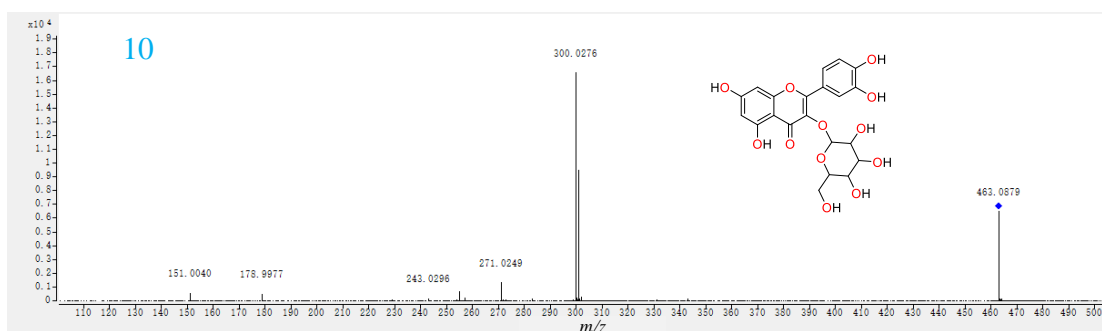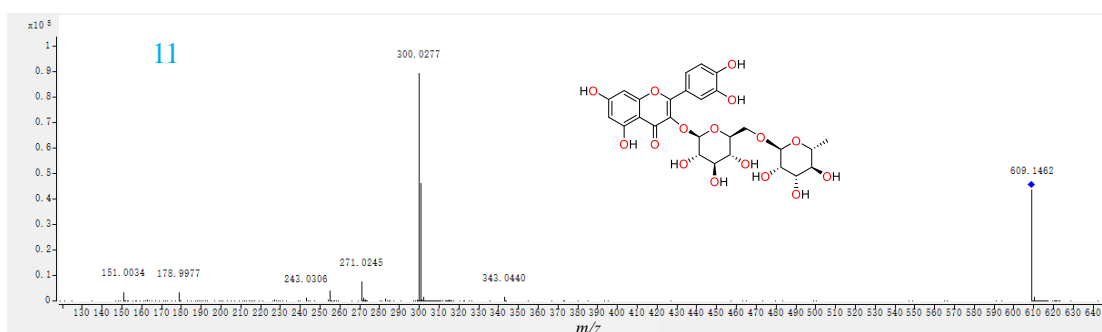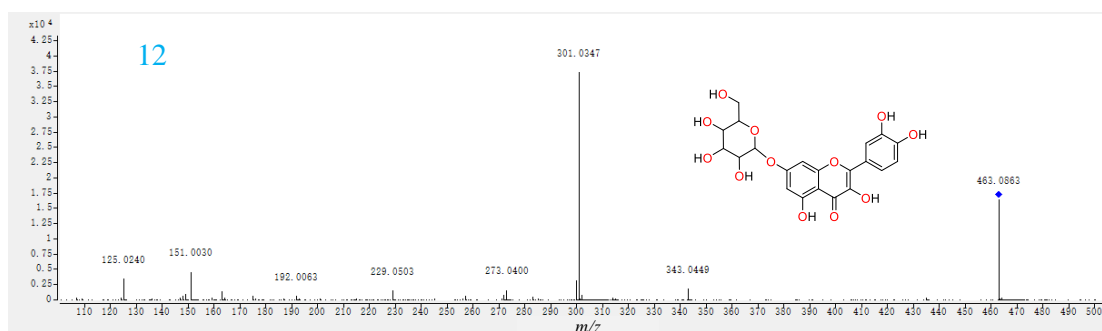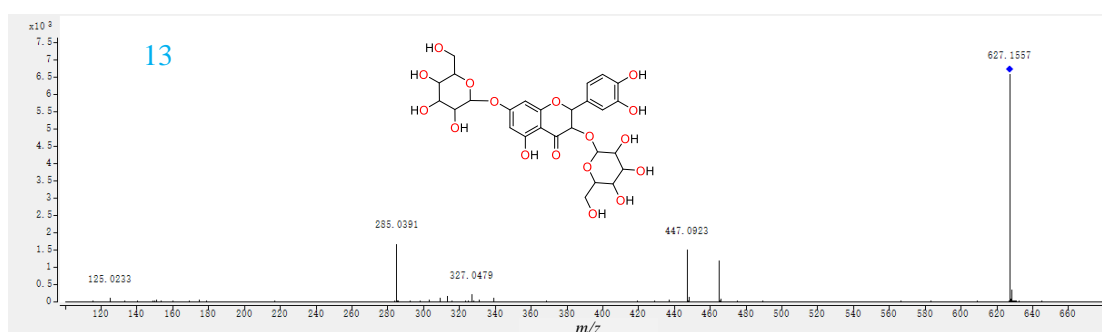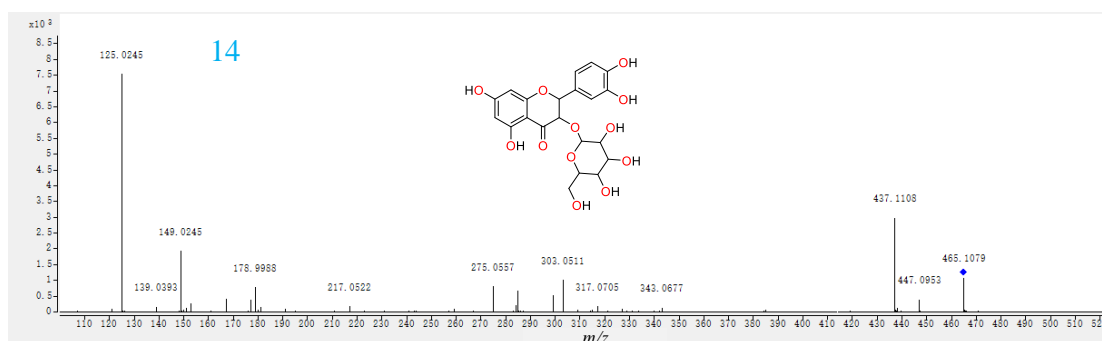

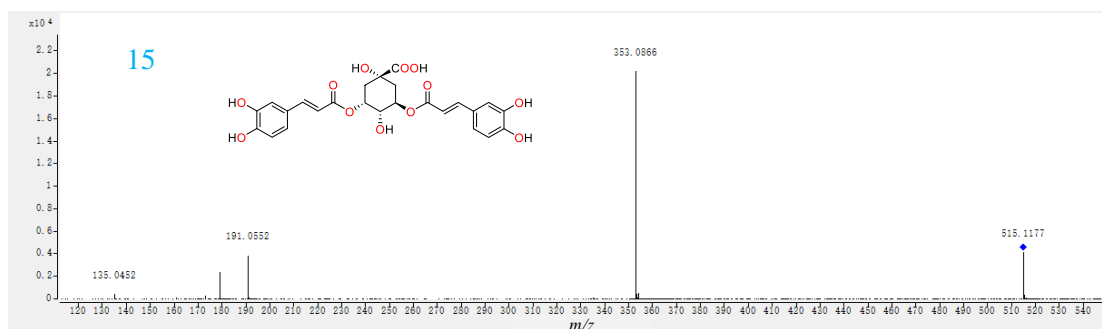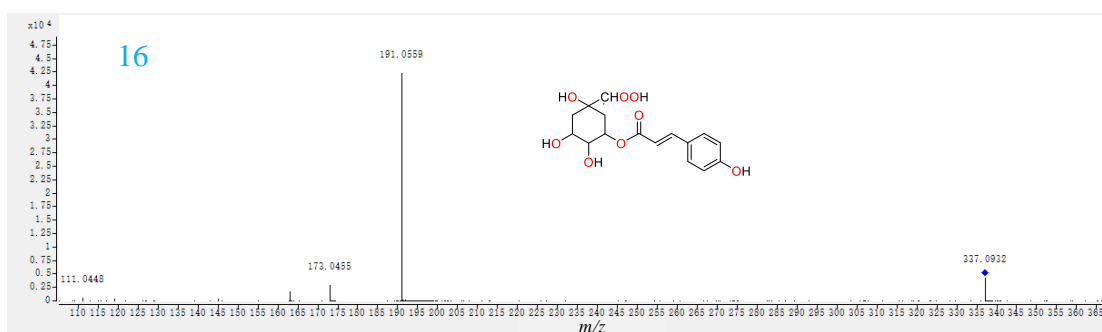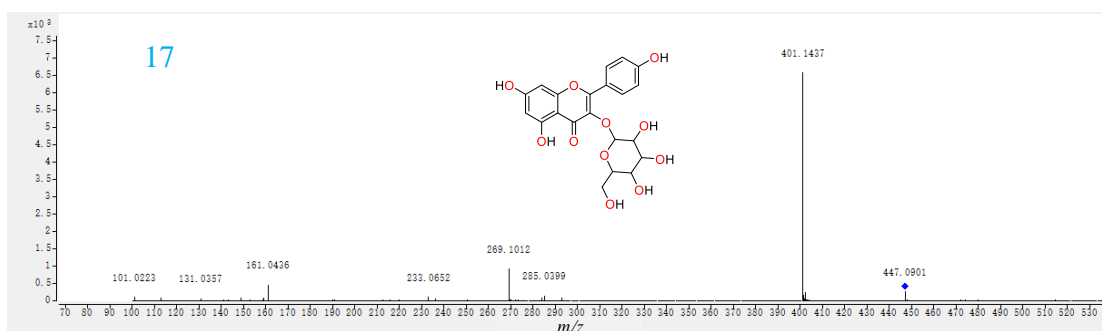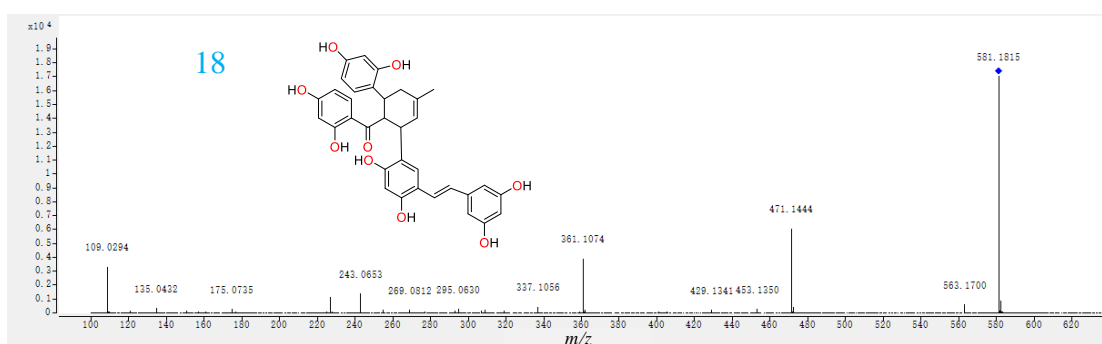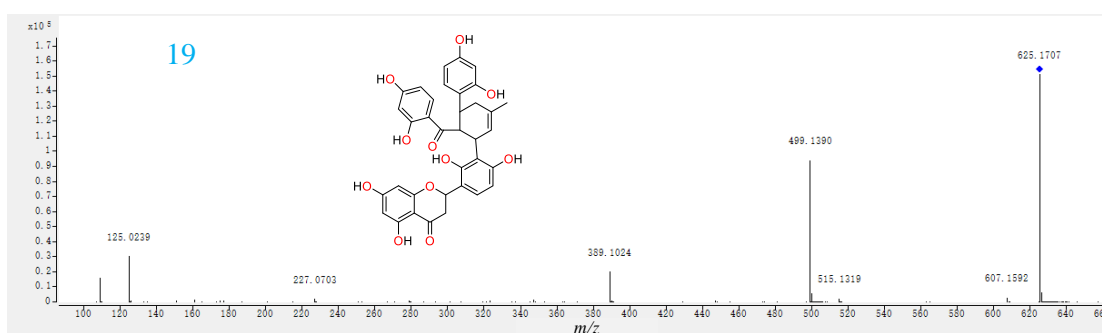

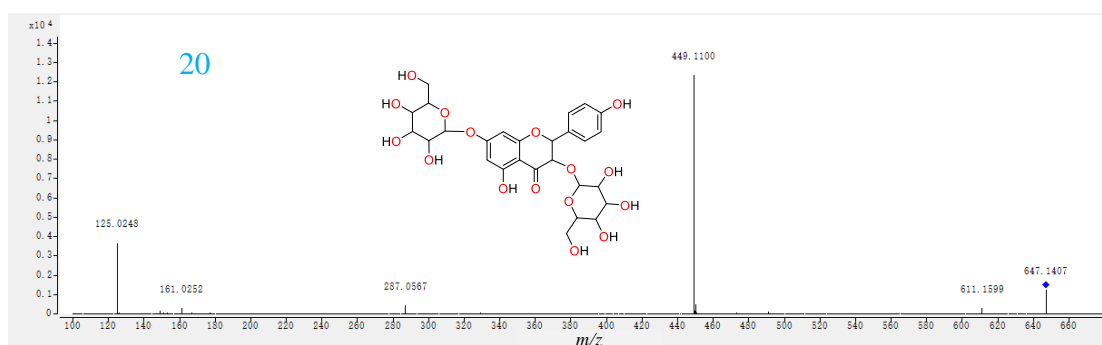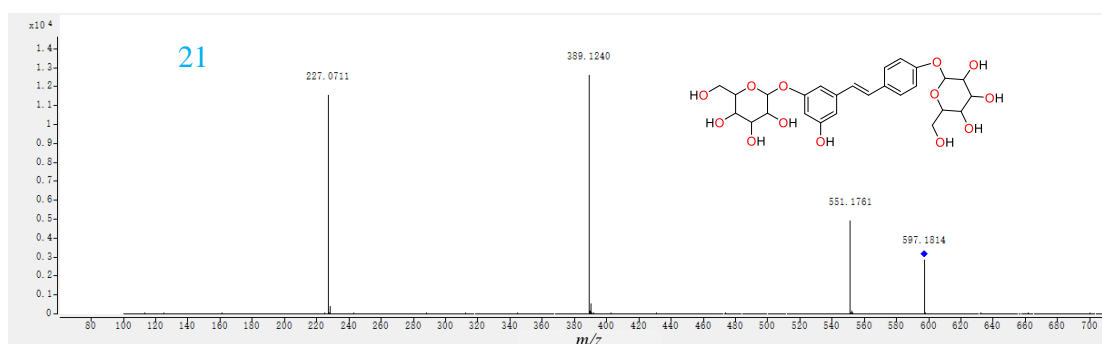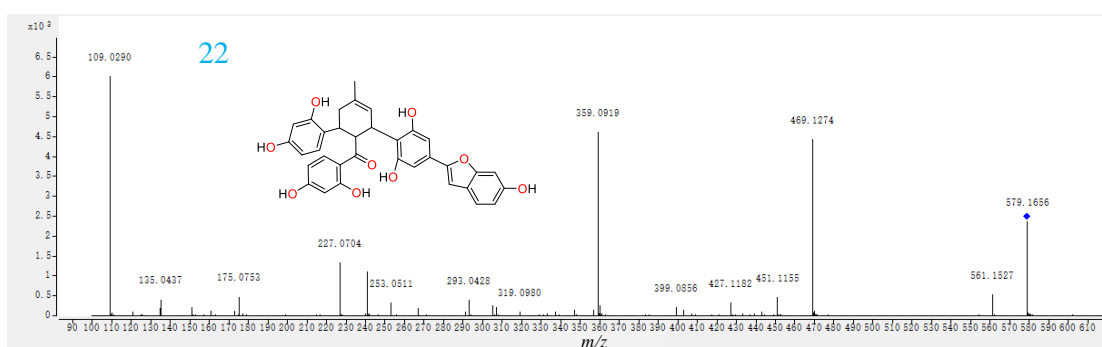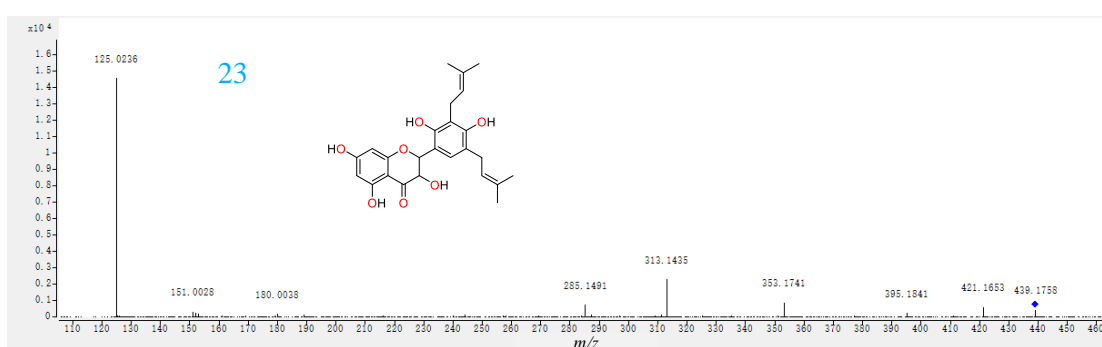

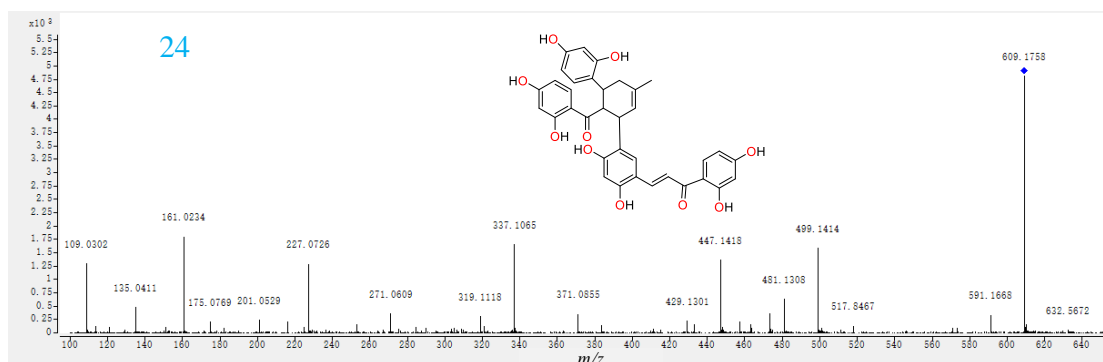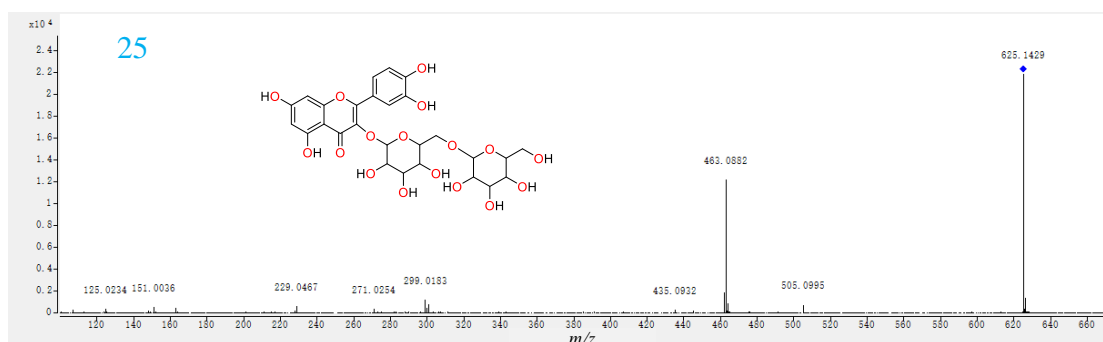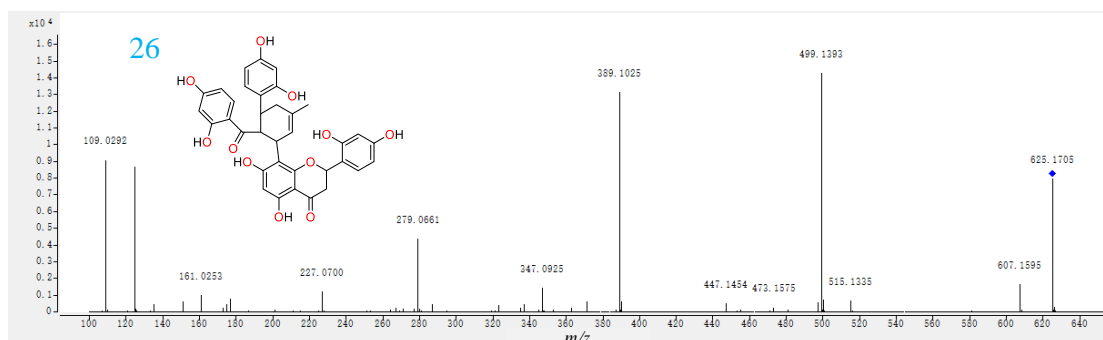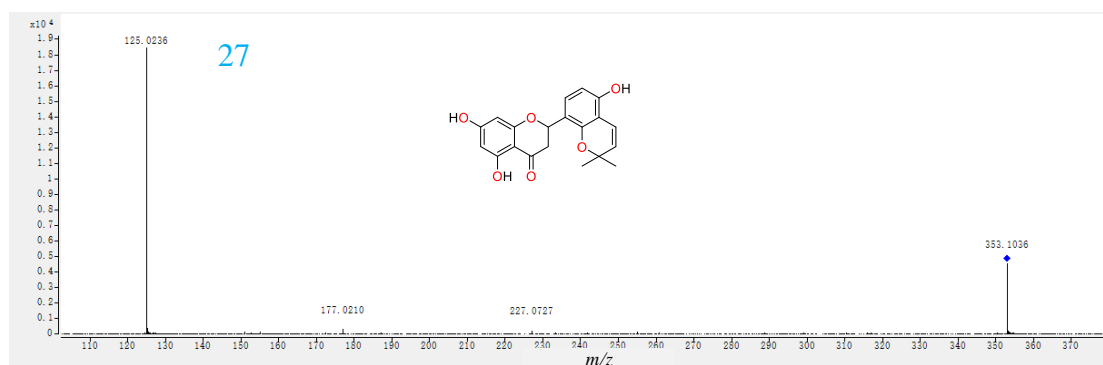

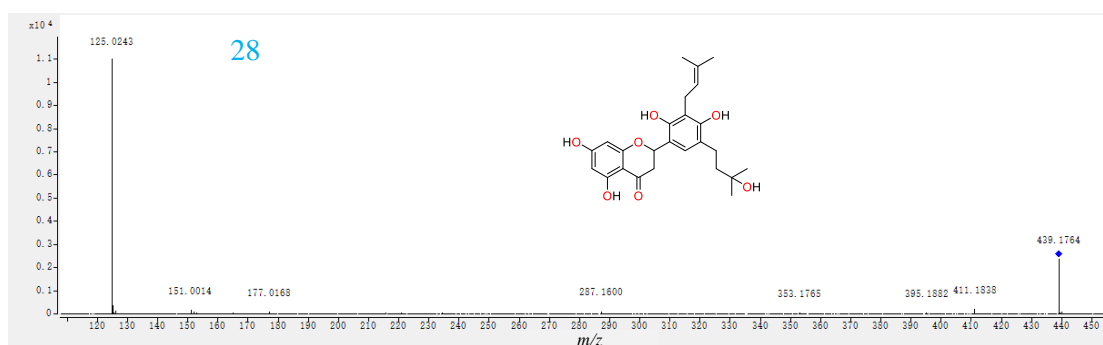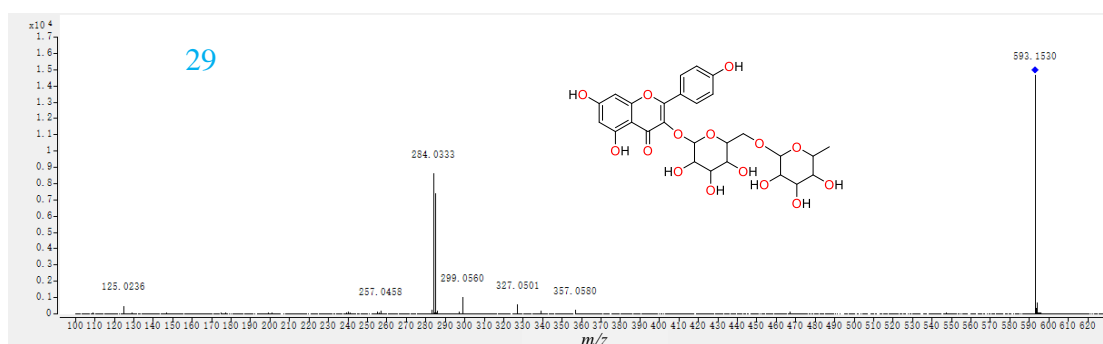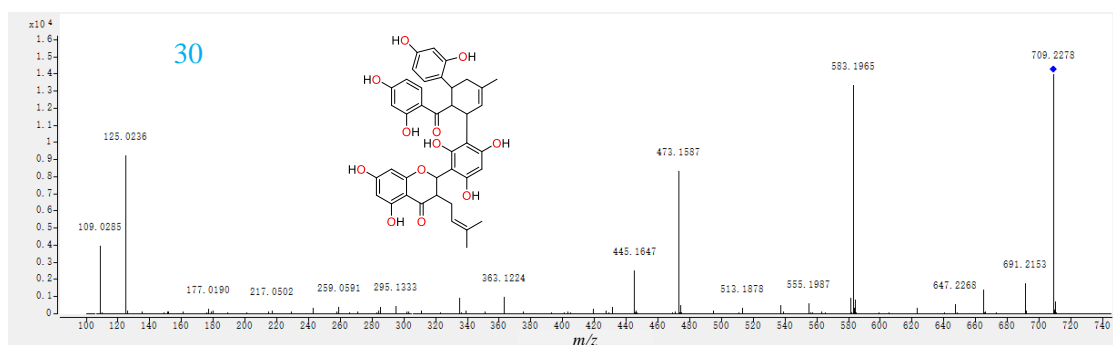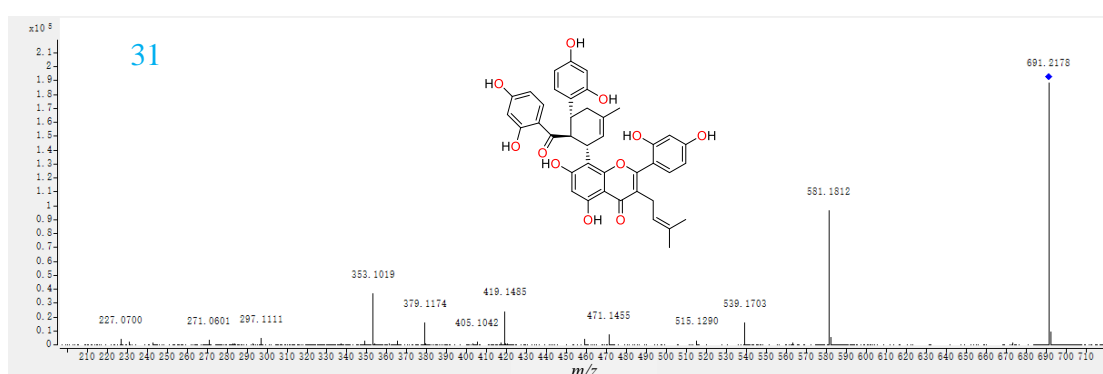



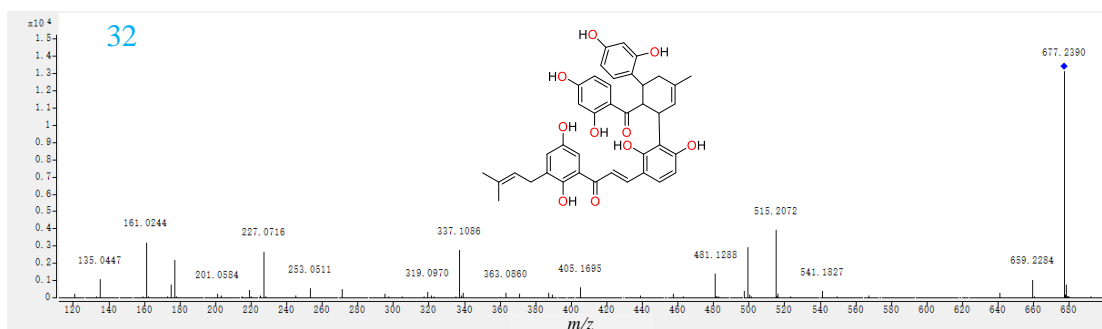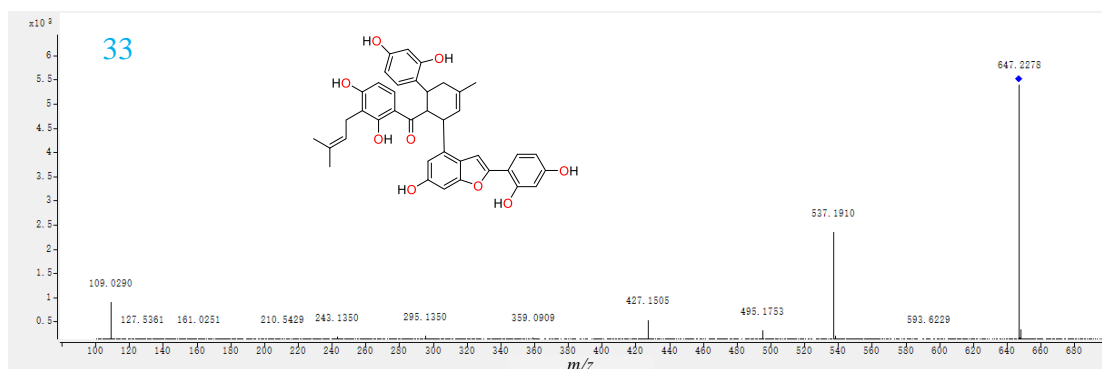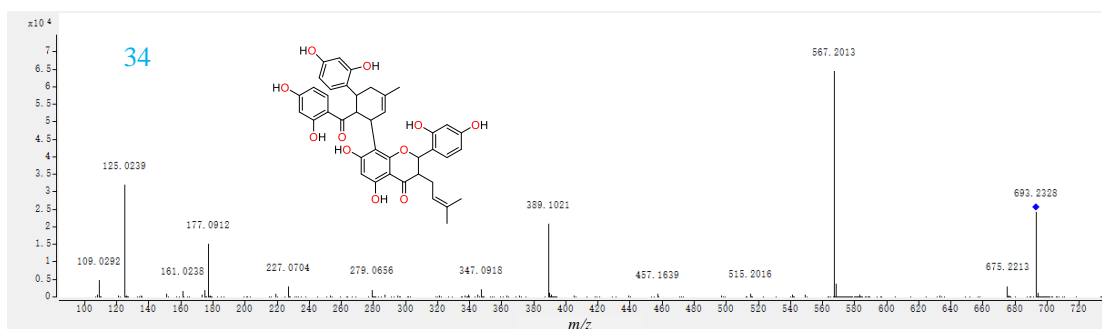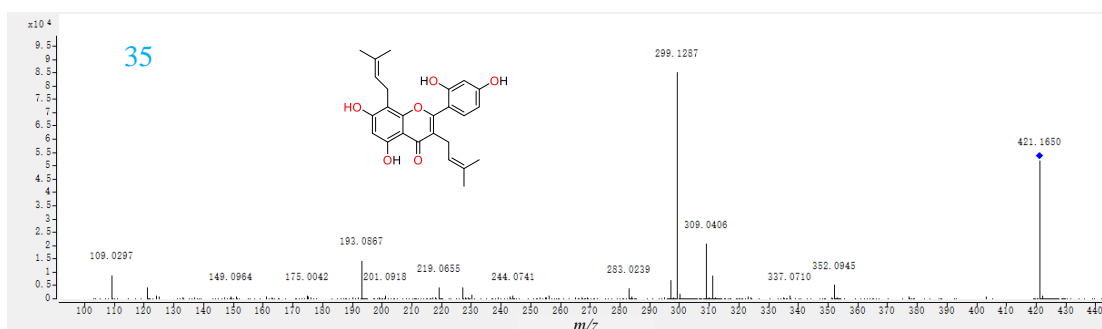

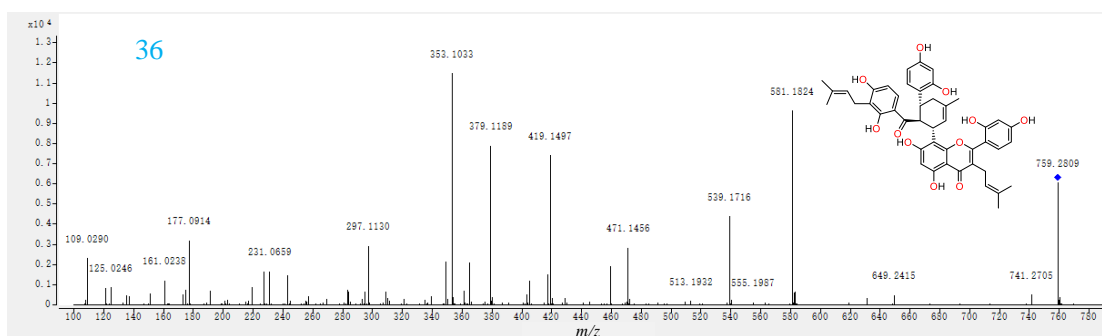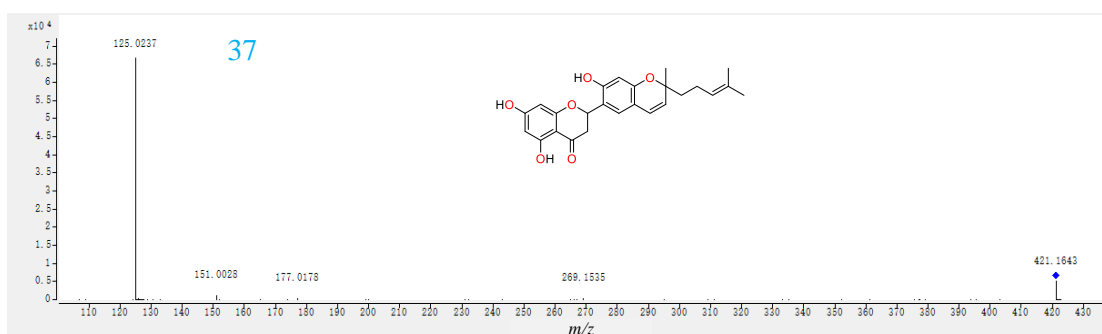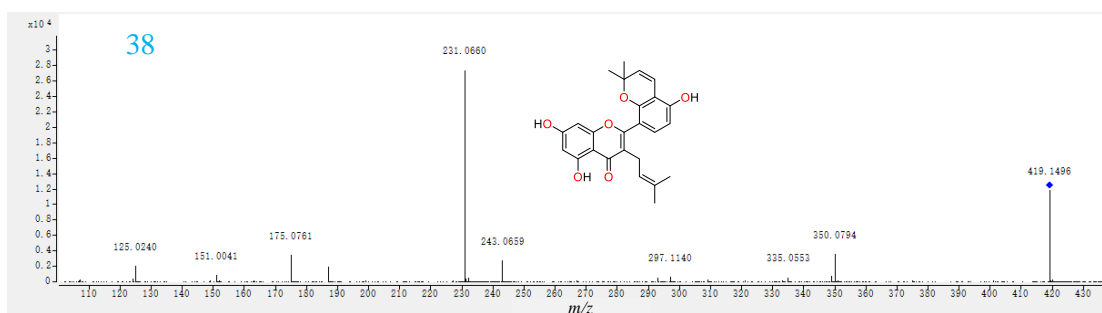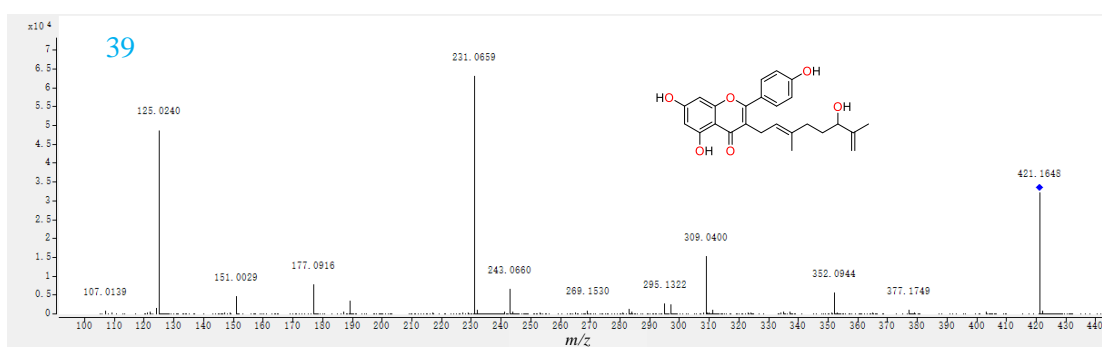

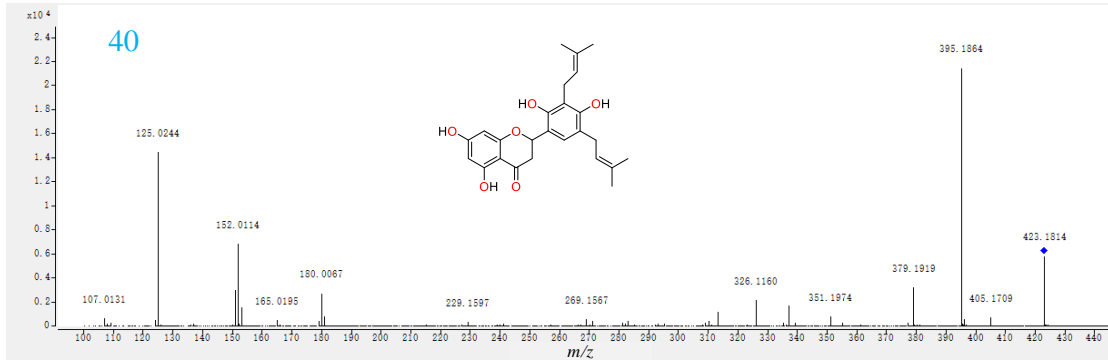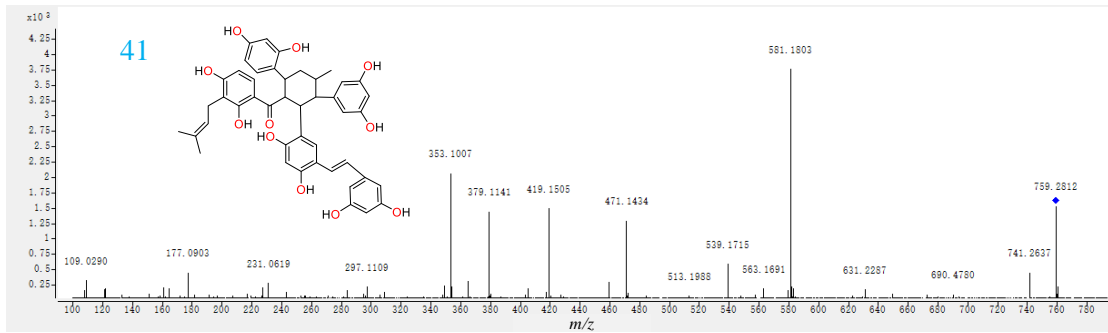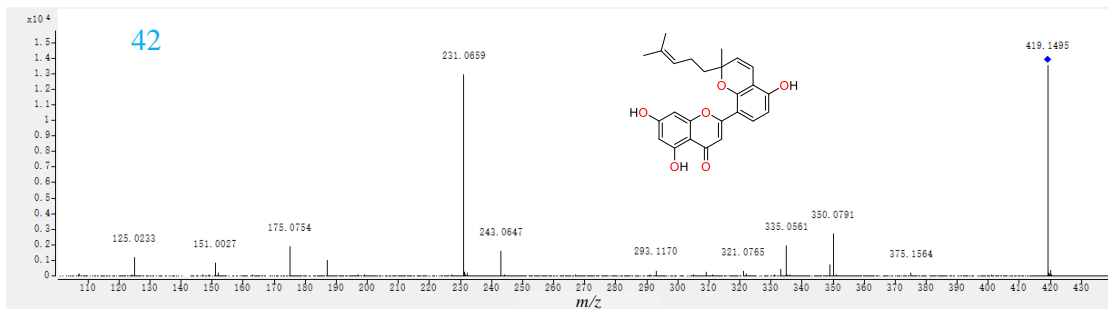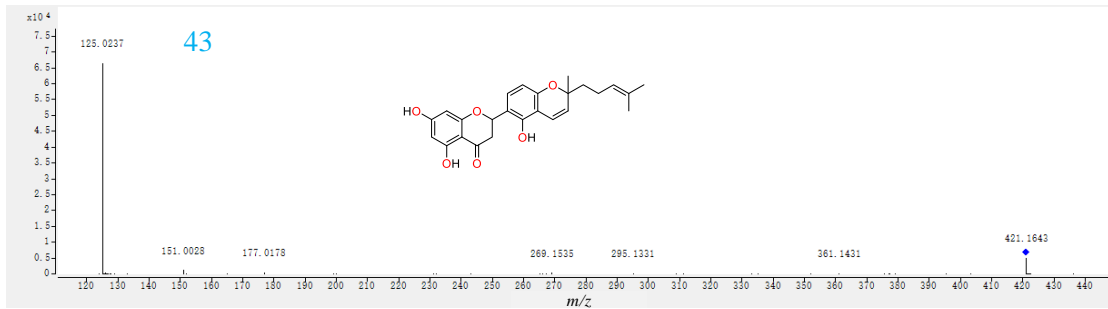

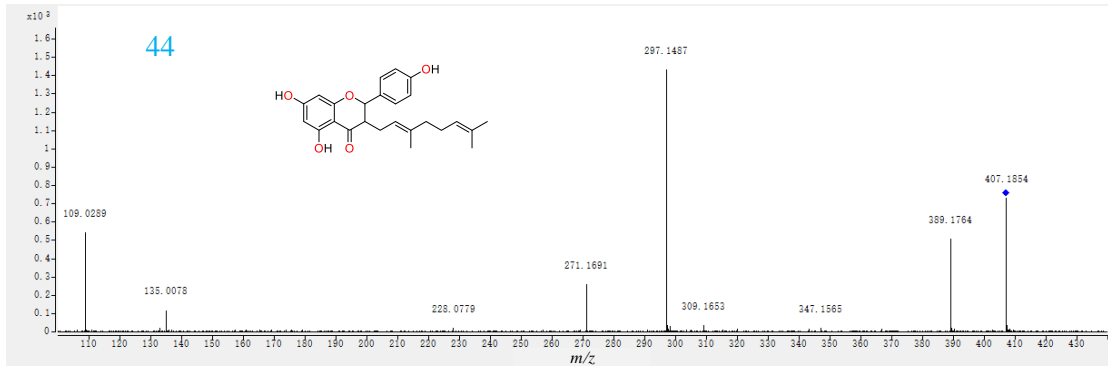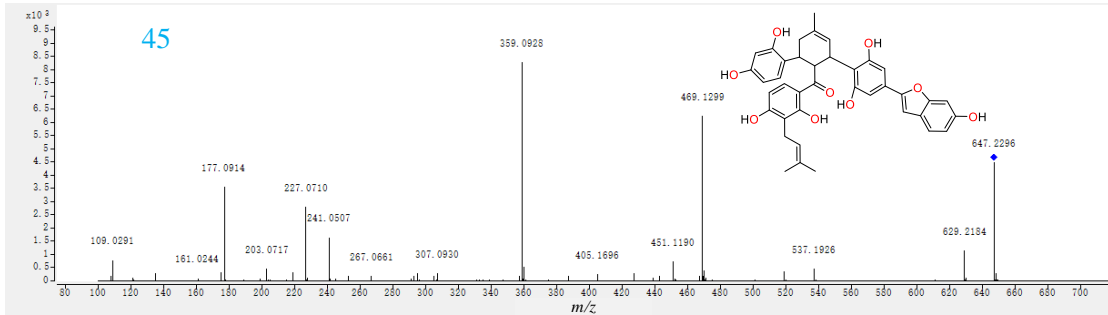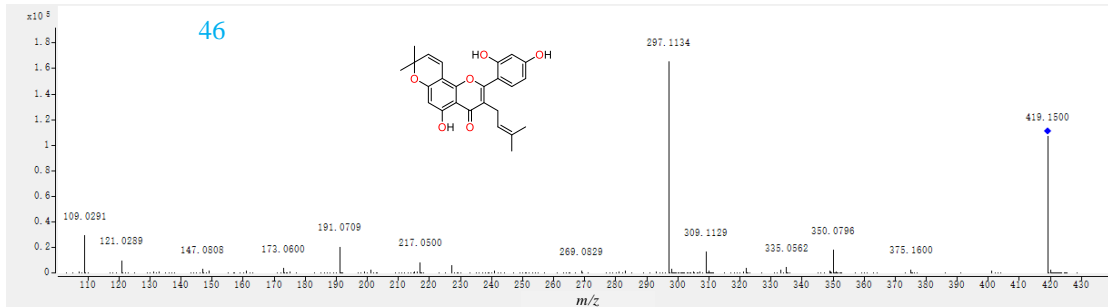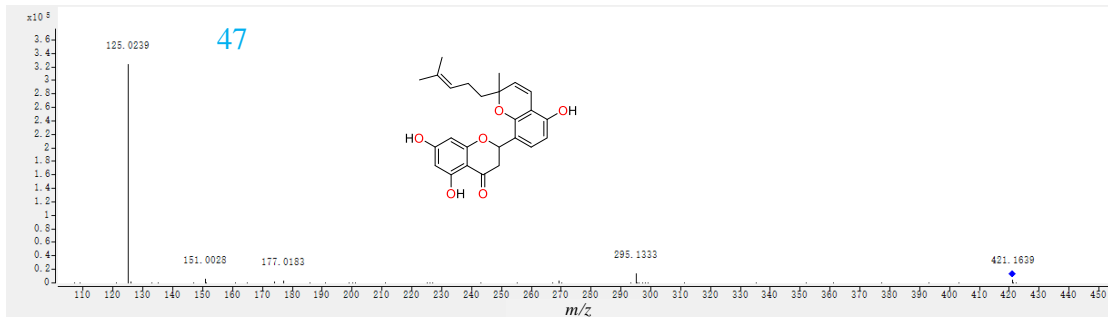

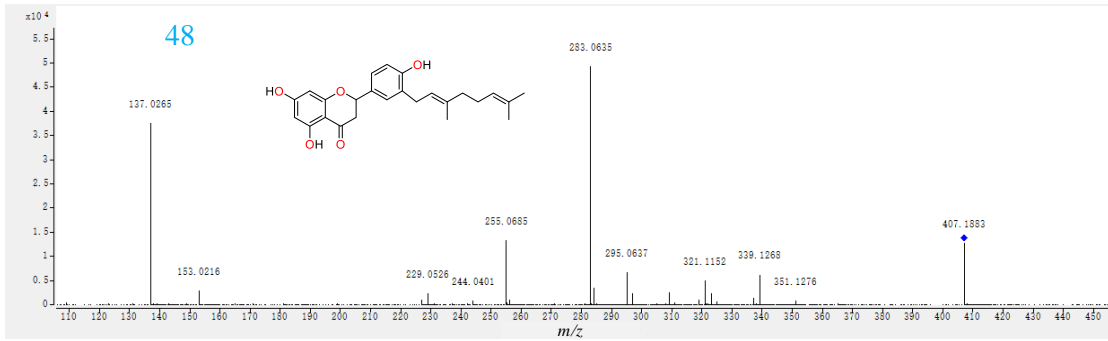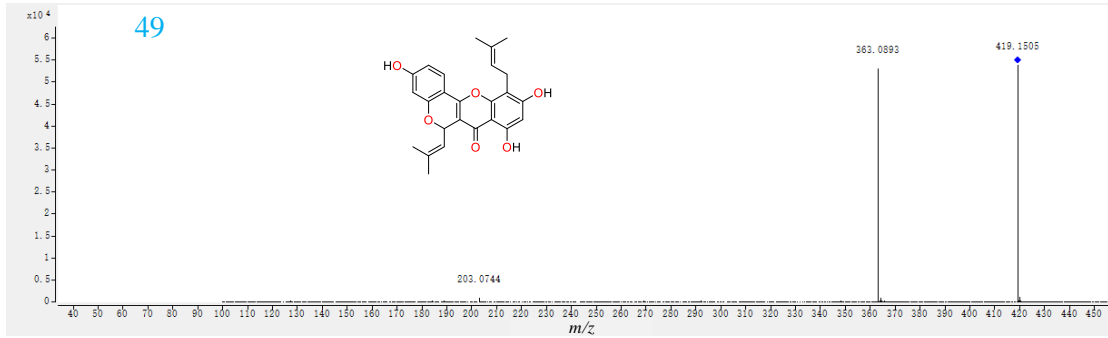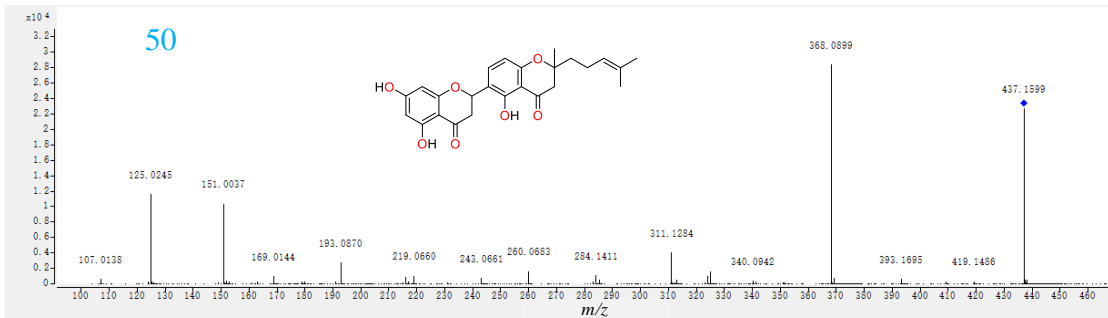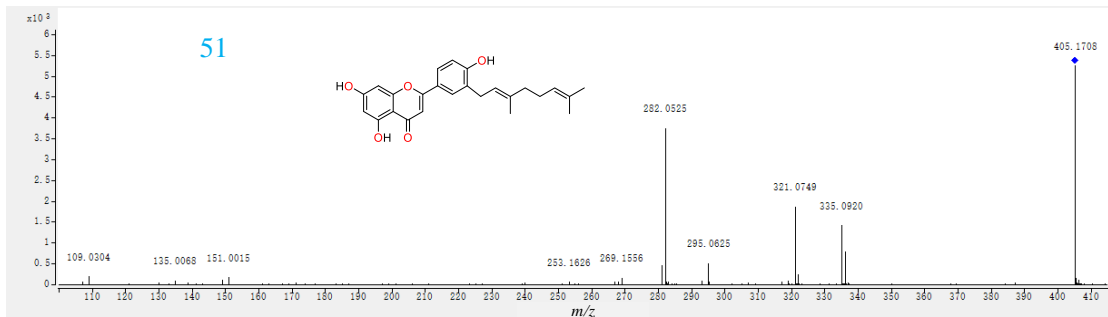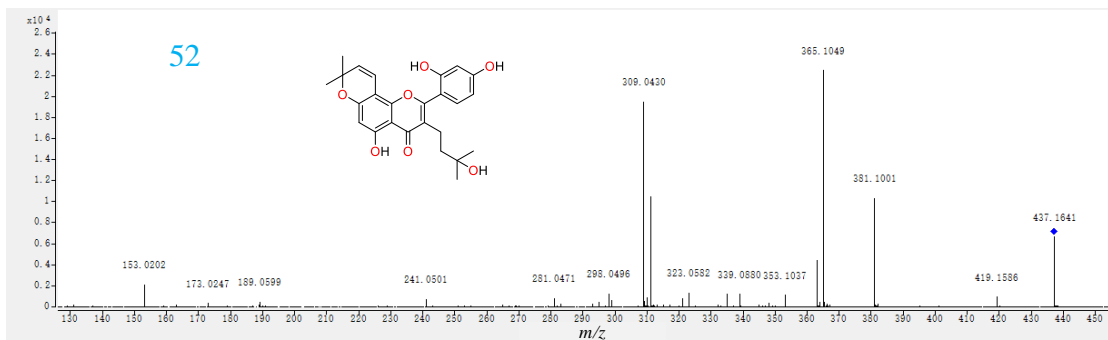

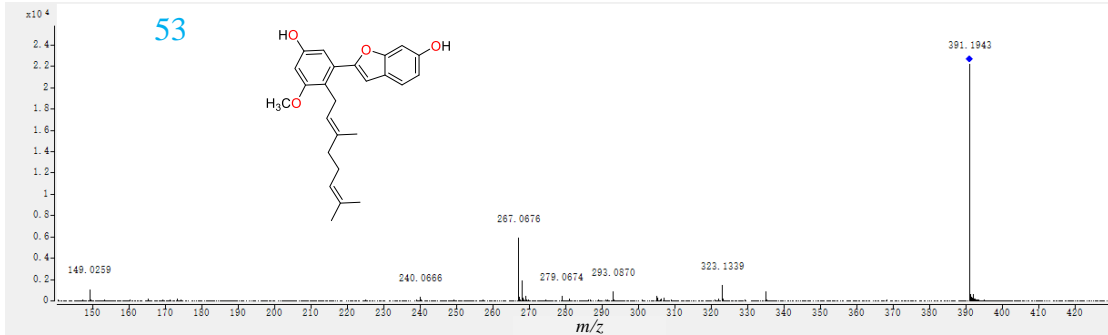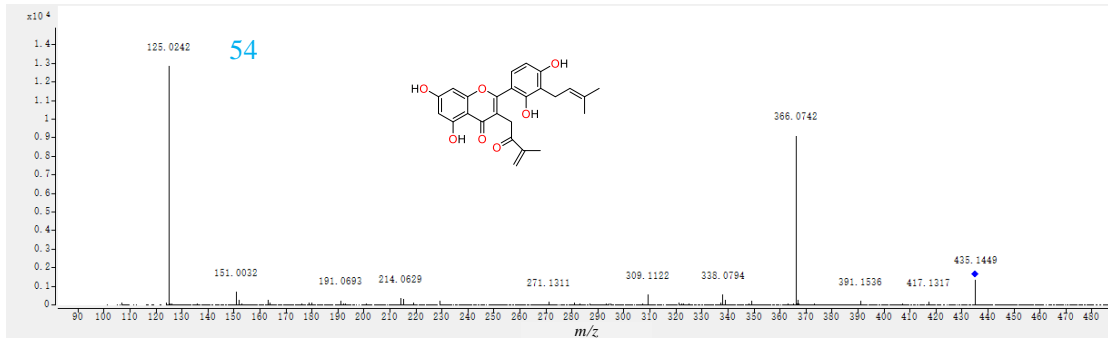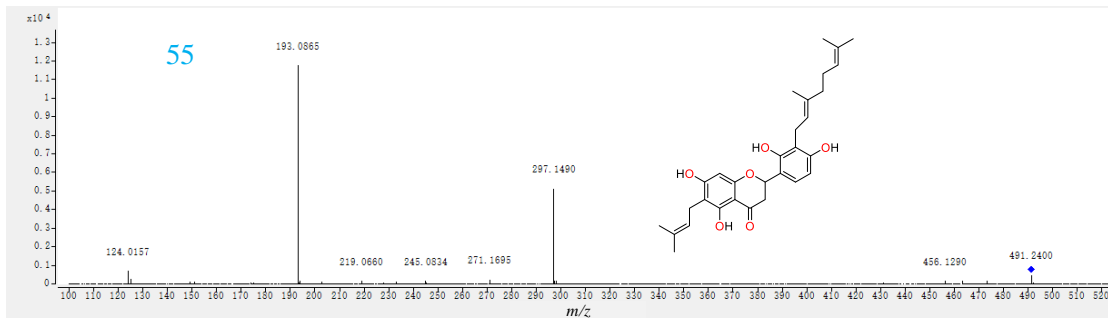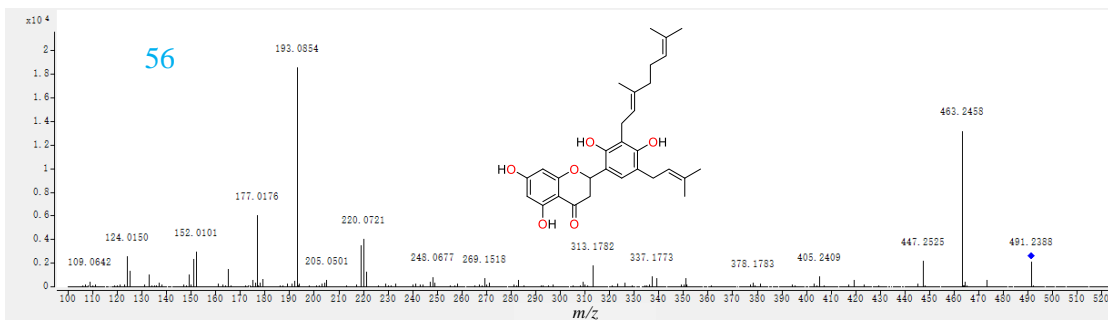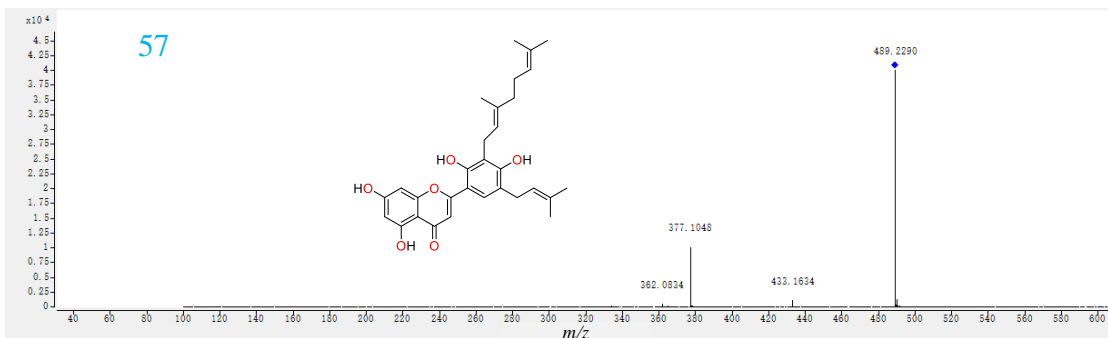

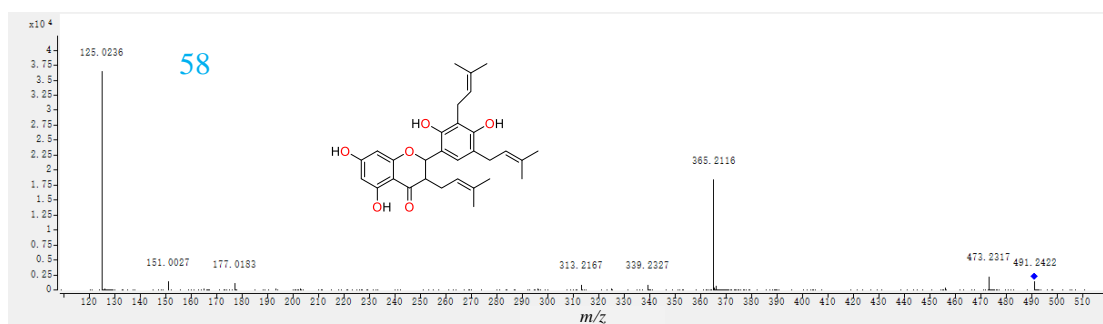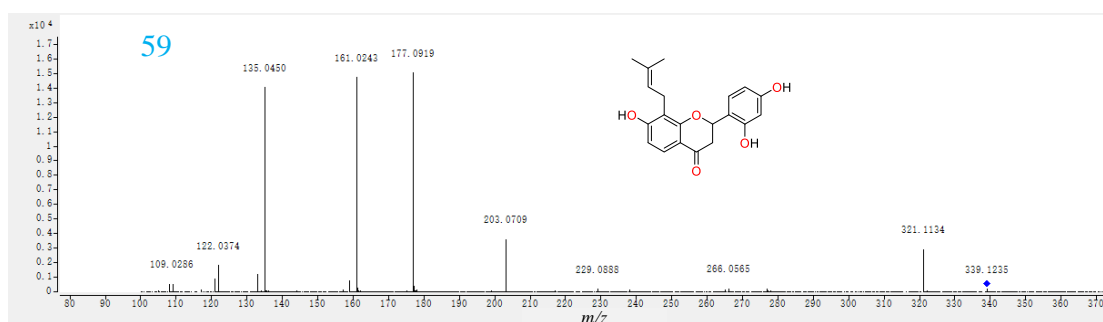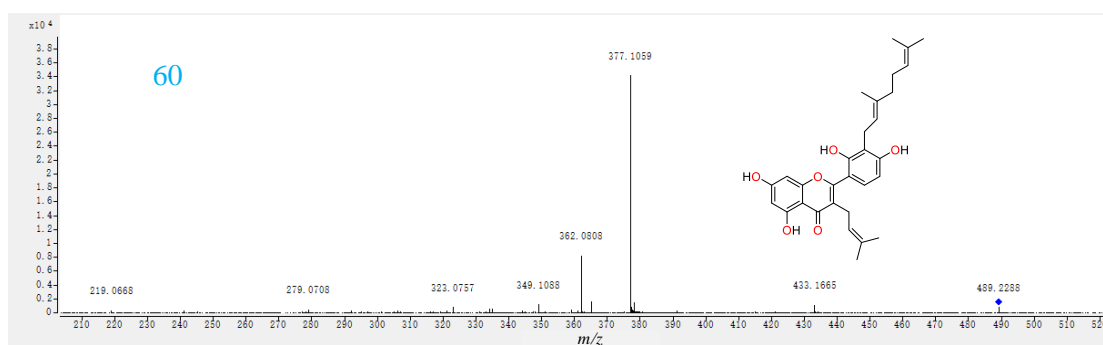

Table S1 The database of reported compounds from the genus of *Morus*.

| No. | Name            | Molecular formula                               | [M+H] <sup>+</sup> | [M-H] <sup>-</sup> | Structure                                                                             |
|-----|-----------------|-------------------------------------------------|--------------------|--------------------|---------------------------------------------------------------------------------------|
| 1   | Lutin           | C <sub>27</sub> H <sub>30</sub> O <sub>16</sub> | 611.1612           | 609.1456           | 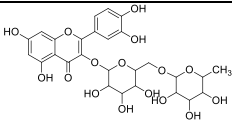   |
| 2   | Mulberrofuran F | C <sub>39</sub> H <sub>34</sub> O <sub>9</sub>  | 647.6898           | 645.6739           |    |
| 3   | Isoquercitrin   | C <sub>21</sub> H <sub>20</sub> O <sub>12</sub> | 465.1033           | 463.0877           |    |
| 4   | Hyperosidine    | C <sub>21</sub> H <sub>20</sub> O <sub>11</sub> | 449.1078           | 447.0927           |    |
| 5   | Astragalin      | C <sub>21</sub> H <sub>20</sub> O <sub>11</sub> | 449.1084           | 447.0927           |   |
| 6   | Morin           | C <sub>15</sub> H <sub>12</sub> O <sub>8</sub>  | 321.0610           | 319.0454           |  |
| 7   | Keampferol      | C <sub>15</sub> H <sub>10</sub> O <sub>6</sub>  | 287.0556           | 285.0399           |  |
| 8   | Muberroside A1  | C <sub>26</sub> H <sub>32</sub> O <sub>14</sub> | 569.1870           | 567.1714           |  |
| 9   | Muberroside E   | C <sub>26</sub> H <sub>32</sub> O <sub>13</sub> | 553.1921           | 551.1765           |  |
| 10  | Muberroside F   | C <sub>26</sub> H <sub>30</sub> O <sub>14</sub> | 567.1724           | 565.1557           |  |
| 11  | Kelampayoside A | C <sub>20</sub> H <sub>30</sub> O <sub>13</sub> | 479.1765           | 477.1608           |  |
| 12  | Oxyresveratrol  | C <sub>14</sub> H <sub>12</sub> O <sub>4</sub>  | 245.0814           | 243.0657           |  |
| 13  | DNJ             | C <sub>6</sub> H <sub>13</sub> NO <sub>4</sub>  | 164.0923           | 162.0766           |  |



|    |                                                                                               |                                                               |          |          |                                                                                       |
|----|-----------------------------------------------------------------------------------------------|---------------------------------------------------------------|----------|----------|---------------------------------------------------------------------------------------|
| 14 | Resveratrol                                                                                   | C <sub>14</sub> H <sub>12</sub> O <sub>3</sub>                | 229.0865 | 227.0708 | 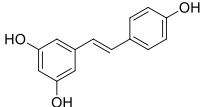   |
| 15 | Cyanidin-3-O-glucoside                                                                        | C <sub>21</sub> H <sub>21</sub> O <sub>11</sub>               | 449.1078 | 447.022  |    |
| 16 | Keracyanin                                                                                    | C <sub>27</sub> H <sub>31</sub> O <sub>15</sub>               | 595.1657 | 593.1501 |    |
| 17 | 1-[5-(2-formylfuryl)methyl]dihydrogen-2-hydroxypropane-1,2,3-tricarboxylate 2,3-diethyl ester | C <sub>16</sub> H <sub>20</sub> O <sub>9</sub>                | 357.1186 | 355.1029 |    |
| 18 | 3,4-(dimethoxyhydro)cinnamic acid                                                             | C <sub>10</sub> H <sub>10</sub> O <sub>4</sub>                | 195.0657 | 193.0501 |    |
| 19 | Salicylic acid                                                                                | C <sub>7</sub> H <sub>6</sub> O <sub>3</sub>                  | 139.0395 | 137.0239 |    |
| 20 | Succinic acid                                                                                 | C <sub>4</sub> H <sub>6</sub> O <sub>4</sub>                  | 119.0344 | 117.0188 |   |
| 21 | Daucoside                                                                                     | C <sub>35</sub> H <sub>60</sub> O <sub>6</sub>                | 577.4468 | 575.4312 |  |
| 22 | Dulcitol                                                                                      | C <sub>6</sub> H <sub>14</sub> O <sub>6</sub>                 | 183.0869 | 181.0712 |  |
| 23 | Aurantiamide                                                                                  | C <sub>25</sub> H <sub>26</sub> N <sub>2</sub> O <sub>3</sub> | 403.2022 | 401.1865 |  |
| 24 | Cytochalasin B                                                                                | C <sub>29</sub> H <sub>37</sub> NO <sub>5</sub>               | 480.2750 | 478.2593 |  |
| 25 | β-sitosterol                                                                                  | C <sub>29</sub> H <sub>50</sub> O                             | 415.3940 | 413.3783 |  |
| 26 | 7β-hydroxy-sitosterol                                                                         | C <sub>29</sub> H <sub>50</sub> O <sub>2</sub>                | 431.3880 | 429.3733 |  |
| 27 | (22E)-24-methyl-5α-cholesta-7,22-diene-3β,5α,6β-triol                                         | C <sub>28</sub> H <sub>46</sub> O <sub>3</sub>                | 431.3525 | 429.3369 |  |
| 28 | (22E)-5α,8α-epidioxyergosta-6,22-dien-3β-ol                                                   | C <sub>28</sub> H <sub>44</sub> O <sub>3</sub>                | 429.3369 | 427.3212 |  |

|    |                       |                                                 |          |          |                                                                                       |
|----|-----------------------|-------------------------------------------------|----------|----------|---------------------------------------------------------------------------------------|
| 29 | Chalcomoracin         | C <sub>39</sub> H <sub>36</sub> O <sub>9</sub>  | 649.2438 | 647.2281 | 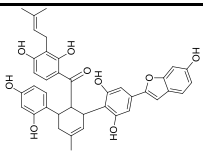   |
| 30 | Morachalcone A        | C <sub>20</sub> H <sub>20</sub> O <sub>5</sub>  | 341.1389 | 339.1232 |    |
| 31 | Isobavachalcone       | C <sub>20</sub> H <sub>20</sub> O <sub>4</sub>  | 325.1440 | 323.1283 |    |
| 32 | Norartocarpetin       | C <sub>15</sub> H <sub>10</sub> O <sub>6</sub>  | 287.0556 | 285.0399 |    |
| 33 | Mulberrofuran F1      | C <sub>39</sub> H <sub>34</sub> O <sub>9</sub>  | 647.2281 | 645.2125 |    |
| 34 | Isoquercitrin         | C <sub>21</sub> H <sub>20</sub> O <sub>12</sub> | 465.1033 | 463.0877 |   |
| 35 | Mulberrin             | C <sub>25</sub> H <sub>26</sub> O <sub>6</sub>  | 423.1808 | 421.1651 |  |
| 36 | Dihydromorin          | C <sub>15</sub> H <sub>12</sub> O <sub>7</sub>  | 305.0661 | 303.0505 |  |
| 37 | Cyclomulberrin        | C <sub>25</sub> H <sub>24</sub> O <sub>6</sub>  | 421.1651 | 419.1495 |  |
| 38 | Cyclomulberrochromene | C <sub>25</sub> H <sub>22</sub> O <sub>6</sub>  | 419.1495 | 417.1338 |  |
| 39 | Cudranin              | C <sub>29</sub> H <sub>26</sub> O <sub>10</sub> | 535.1599 | 533.1456 |  |
| 40 | Morusin               | C <sub>25</sub> H <sub>24</sub> O <sub>6</sub>  | 421.1651 | 419.1495 |  |
| 41 | Moracin D             | C <sub>19</sub> H <sub>16</sub> O <sub>4</sub>  | 309.1127 | 307.0970 |  |
| 42 | Moracin M             | C <sub>14</sub> H <sub>10</sub> O <sub>4</sub>  | 243.0567 | 241.0501 |  |
| 43 | Betulinic acid        | C <sub>30</sub> H <sub>48</sub> O <sub>3</sub>  | 457.3682 | 455.3525 |  |

|    |                                          |                                                 |          |          |                                                                                       |
|----|------------------------------------------|-------------------------------------------------|----------|----------|---------------------------------------------------------------------------------------|
| 44 | Kuwanon G                                | C <sub>40</sub> H <sub>36</sub> O <sub>11</sub> | 693.2336 | 691.2179 | 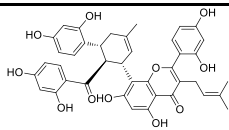   |
| 45 | Mulberrofuran G                          | C <sub>34</sub> H <sub>26</sub> O <sub>8</sub>  | 563.1706 | 561.1549 |    |
| 47 | Soroceal B                               | C <sub>27</sub> H <sub>22</sub> O <sub>7</sub>  | 459.1444 | 457.1287 |    |
| 48 | Sanggenol Q                              | C <sub>25</sub> H <sub>28</sub> O <sub>6</sub>  | 425.1964 | 423.1808 |    |
| 49 | Mulberrofuran C                          | C <sub>34</sub> H <sub>28</sub> O <sub>9</sub>  | 581.1812 | 579.1655 |    |
| 50 | Sanggenol P                              | C <sub>30</sub> H <sub>36</sub> O <sub>6</sub>  | 493.2590 | 491.2434 |   |
| 51 | Licoflavone C                            | C <sub>20</sub> H <sub>18</sub> O <sub>5</sub>  | 339.1232 | 337.1076 |  |
| 52 | Morusinol                                | C <sub>25</sub> H <sub>26</sub> O <sub>7</sub>  | 439.1757 | 437.1600 |  |
| 53 | Sanggenon N                              | C <sub>25</sub> H <sub>26</sub> O <sub>6</sub>  | 439.1751 | 437.1600 |  |
| 54 | (2S)-4'-hydroxy-7-methoxy-8-prenylflavan | C <sub>21</sub> H <sub>24</sub> O <sub>3</sub>  | 325.1804 | 323.1647 |  |
| 55 | 2',7-dihydroxy-4'-methoxy-8-prenylflavan | C <sub>21</sub> H <sub>24</sub> O <sub>4</sub>  | 341.1753 | 339.1596 |  |
| 56 | Brosimine B                              | C <sub>20</sub> H <sub>22</sub> O <sub>3</sub>  | 311.1647 | 309.1491 |  |
| 58 | Morachalcone B                           | C <sub>20</sub> H <sub>20</sub> O <sub>5</sub>  | 339.1232 | 337.1076 |  |
| 59 | moracin C                                | C <sub>19</sub> H <sub>18</sub> O <sub>4</sub>  | 311.1283 | 309.1127 |  |
| 60 | 7-hydroxycoumarin                        | C <sub>9</sub> H <sub>6</sub> O <sub>3</sub>    | 163.0395 | 161.0239 |  |

|    |                                    |                   |          |          |                                                                                       |
|----|------------------------------------|-------------------|----------|----------|---------------------------------------------------------------------------------------|
| 61 | Scopoletin                         | $C_{10}H_8O_4$    | 193.0501 | 191.0344 | 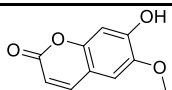   |
| 62 | Sigmoidin A                        | $C_{25}H_{28}O_6$ | 425.1964 | 423.1808 |    |
| 63 | Ursolic acid                       | $C_{30}H_{48}O_3$ | 457.3682 | 455.3525 |    |
| 64 | Fagomine                           | $C_6H_{13}NO_3$   | 148.0974 |          |    |
| 65 | 1,4-dideoxy-1,4-imino-D-arabinitol | $C_5H_{11}NO_3$   | 134.0817 |          |    |
| 66 | Zarzissine                         | $C_5H_5N_5$       | 136.0623 |          |    |
| 67 | Amidinoproline                     | $C_6H_{11}N_3O_2$ | 158.0930 |          |   |
| 68 | 2-methyl-hydrazinecarboxylic acid  | $C_2H_6N_2O_2$    | 91.0508  |          | $H_3C-NH-NH-COOH$                                                                     |
| 69 | Norscopolamine                     | $C_7H_{12}NO_4$   | 176.0923 |          |  |
| 70 | Grateloupinami                     | $C_5H_{11}N_3O_2$ | 146.0930 |          |  |
| 71 | SanggenolP                         | $C_{30}H_{36}O_6$ | 493.2590 | 491.2434 |  |
| 72 | Mulberrofuran G                    | $C_{34}H_{26}O_8$ | 563.1706 | 561.1549 |                                                                                       |
| 73 | Sanggenol A                        | $C_{25}H_{28}O_6$ | 425.1964 | 423.1808 |  |
| 74 | Sanggenol L                        | $C_{25}H_{26}O_6$ | 423.1808 | 421.1651 |  |
| 75 | Cyclocommunol                      | $C_{20}H_{16}O_6$ | 353.1025 | 351.0869 |  |
| 76 | Morusone                           | $C_{25}H_{22}O_7$ | 435.1444 | 433.1287 |  |

|    |                                                                                                   |                                                 |          |          |  |
|----|---------------------------------------------------------------------------------------------------|-------------------------------------------------|----------|----------|--|
| 77 | Steppogenin                                                                                       | C <sub>15</sub> H <sub>12</sub> O <sub>6</sub>  | 289.0712 | 287.0556 |  |
| 78 | Dihydrokaempferol                                                                                 | C <sub>15</sub> H <sub>12</sub> O <sub>6</sub>  | 289.0712 | 287.0556 |  |
| 79 | Eriodictyol                                                                                       | C <sub>15</sub> H <sub>12</sub> O <sub>6</sub>  | 289.0712 | 287.0556 |  |
| 80 | 2,4-dihydroxybenzoic acid                                                                         | C <sub>7</sub> H <sub>6</sub> O <sub>4</sub>    | 155.0344 | 153.0188 |  |
| 81 | <i>p</i> -coumaric acid                                                                           | C <sub>9</sub> H <sub>8</sub> O <sub>3</sub>    | 165.0552 | 163.0395 |  |
| 82 | Moracin D                                                                                         | C <sub>20</sub> H <sub>18</sub> O <sub>4</sub>  | 323.1283 | 321.1127 |  |
| 82 | Moracin J                                                                                         | C <sub>15</sub> H <sub>12</sub> O <sub>5</sub>  | 273.0763 | 271.0606 |  |
| 82 | Moracin B                                                                                         | C <sub>20</sub> H <sub>18</sub> O <sub>4</sub>  | 287.0919 | 285.0763 |  |
| 83 | 2,4,2',4'-tetrahydroxy-chalcone                                                                   | C <sub>15</sub> H <sub>12</sub> O <sub>5</sub>  | 273.0763 | 271.0606 |  |
| 84 | 5,7,2',4'-tetrahydroxy-3-methoxyflavone                                                           | C <sub>17</sub> H <sub>14</sub> O <sub>6</sub>  | 315.0869 | 313.0712 |  |
| 85 | (2E)-1-[2,3-dihydro-4-hydroxy-2-(1-methylethenyl)-5-benzofuranyl]-3-(4-hydroxyphenyl)-1-propanone | C <sub>20</sub> H <sub>18</sub> O <sub>4</sub>  | 323.1283 | 321.1127 |  |
| 86 | Quercetin                                                                                         | C <sub>15</sub> H <sub>10</sub> O <sub>7</sub>  | 303.0505 | 301.0348 |  |
| 87 | 3-O-(6''-O-acetyl)-β-D-glucopyranoside                                                            | C <sub>23</sub> H <sub>22</sub> O <sub>13</sub> | 507.1139 | 506.1060 |  |
| 88 | Isouercetin                                                                                       | C <sub>21</sub> H <sub>20</sub> O <sub>12</sub> | 465.1033 | 463.0877 |  |
| 89 | Quercetin 3,7-di-O-β-D-glucopyranoside                                                            | C <sub>27</sub> H <sub>30</sub> O <sub>17</sub> | 627.1561 | 625.1405 |  |

|     |                                                               |                      |          |          |                                                                                       |
|-----|---------------------------------------------------------------|----------------------|----------|----------|---------------------------------------------------------------------------------------|
| 90  | Kaempferol 3-O-b-D-glucopyranoside                            | $C_{21}H_{20}O_{11}$ | 449.1084 | 447.0927 | 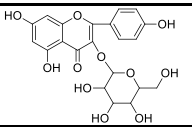   |
| 91  | 5,7,3'-trihydroxy-flavanone-4'-O-b-D-glucopyranoside          | $C_{21}H_{20}O_{11}$ | 449.1084 | 447.0927 |    |
| 92  | 5,7,4'-trihydroxy-flavanone-3'-O-b-D-glucopyranoside          | $C_{21}H_{20}O_{11}$ | 449.1084 | 447.0927 |    |
| 93  | Jaboticabin                                                   | $C_{16}H_{14}O_8$    | 335.0767 | 333.0610 |    |
| 94  | 2-O-(3,4-dihydroxybenzoyl)-2,4,6-trihydroxy-phenylacetic acid | $C_{15}H_{12}O_8$    | 321.0610 | 319.0454 |    |
| 95  | p-hydroxybenzoic acid                                         | $C_7H_6O_3$          | 139.0395 | 137.0239 |    |
| 96  | Protocatechuic acid                                           | $C_7H_6O_4$          | 155.0344 | 153.0188 |   |
| 97  | vanillic acid                                                 | $C_8H_8O_4$          | 169.0501 | 167.0344 |  |
| 98  | vanillic acid methyl ester                                    | $C_8H_8O_4$          | 169.0501 | 167.0344 |  |
| 99  | protocatechuic acid ethyl ester                               | $C_9H_{10}O_4$       | 183.0657 | 181.0501 |  |
| 100 | 4-hydroxyphenylacetic acid methyl ester                       | $C_9H_{10}O_3$       | 167.0708 | 165.0552 |  |
| 101 | 5,7-dihydroxychromone                                         | $C_9H_6O_4$          | 179.0344 | 177.0188 |  |
| 102 | Tyrosol                                                       | $C_8H_{10}O_2$       | 139.0759 | 137.0603 |  |
| 103 | Pyrocatechol                                                  | $C_6H_6O_2$          | 111.0446 | 109.0290 |  |
| 104 | Acetic acid                                                   | $C_2H_4O_2$          | 61.0290  | 59.1033  |  |
| 105 | Alanine                                                       | $C_3H_7NO_2$         |          |          |  |
| 106 | Asparagine                                                    | $C_4H_7NO_4$         |          |          |  |

|     |                                                 |                      |          |          |                                                                                       |
|-----|-------------------------------------------------|----------------------|----------|----------|---------------------------------------------------------------------------------------|
| 107 | Choline                                         | $C_5H_{13}NO_4^+$    |          |          | 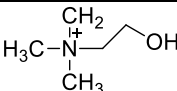   |
| 108 | Fumaric acid                                    | $C_4H_4O_4$          |          |          |    |
| 109 | GABA                                            | $C_4H_9NO_4$         |          |          |    |
| 110 | Glucose                                         | $C_6H_{12}O_5$       | 165.0763 | 163.0606 |    |
| 111 | Proline                                         | $C_5H_9NO_2$         | 116.0712 | 114.0555 |    |
| 112 | Succinic acid                                   | $C_4H_6O_4$          | 119.0344 | 117.0188 |    |
| 113 | Sucrose                                         | $C_{12}H_{22}O_{11}$ | 343.1240 | 341.1084 |    |
| 114 | Trigonelline                                    | $C_7H_7NO_2$         | 138.0555 | 136.0399 |  |
| 115 | Kaempferol 3-O-rutinoside                       | $C_{27}H_{30}O_{15}$ | 595.1663 | 593.1506 |  |
| 116 | 5-O-caffeoylquinic acid                         | $C_{16}H_{18}O_{19}$ | 355.1029 | 353.0873 |  |
| 117 | 3-O-(6''-O-a-rhamnopyranosyl-b-glucopyranoside) | $C_{27}H_{31}O_{15}$ | 595.1663 |          |  |
| 118 | Cyanidin 3-O-b-glucopyranoside                  | $C_{21}H_{21}O_{11}$ | 449.1078 |          |  |
| 119 | Cyanidin 7-O-b-glucopyranoside                  | $C_{21}H_{21}O_{11}$ | 449.1078 |          |  |
| 120 | Artoindonesianin O                              | $C_{20}H_{20}O_4$    | 325.1440 | 323.1283 |  |
| 121 | Loliolide                                       | $C_{11}H_{16}O_3$    | 197.1178 | 195.1021 |  |
| 123 | Steppogenin-7,4'-di-O-beta-D-glucoside          | $C_{27}H_{32}O_{16}$ | 613.1769 | 611.1612 |  |

|     |                                                       |                      |          |          |                                                                                       |
|-----|-------------------------------------------------------|----------------------|----------|----------|---------------------------------------------------------------------------------------|
| 124 | Aldehyde                                              | $C_6H_{12}O_3$       | 133.0865 | 131.0708 | 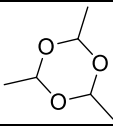   |
| 125 | DL-Proline                                            | $C_5H_9NO_2$         | 116.0712 |          |    |
| 126 | Phenprobamate                                         | $C_{10}H_{13}NO_2$   | 180.1025 |          |    |
| 127 | Luteolin                                              | $C_{15}H_{10}O_6$    | 287.0556 | 285.0399 |    |
| 128 | Butein                                                | $C_{15}H_{12}O_5$    | 273.0763 | 271.0606 |    |
| 129 | Hyperoside                                            | $C_{21}H_{20}O_{12}$ | 465.1033 | 463.0877 |    |
| 130 | Rubraflavone a                                        | $C_{25}H_{26}O_5$    | 407.1858 | 405.1702 |   |
| 131 | Naringenin                                            | $C_{15}H_{12}O_5$    | 273.0763 | 271.0606 |  |
| 132 | Liriodendrin                                          | $C_{34}H_{46}O_{18}$ | 743.2762 | 741.2606 |  |
| 133 | Vanillin                                              | $C_8H_8O_3$          | 153.0552 | 151.0395 |  |
| 134 | Steppogenin-7,4'-di-O-β-D-glucosiade                  | $C_{27}H_{32}O_{16}$ | 613.1769 | 611.1612 |  |
| 135 | 5-(hydroxymethyl)-1H-pyrrole-2-carboxaldehyde         | $C_6H_7NO_2$         | 126.0555 | 124.0399 |  |
| 136 | 2-formyl-1H-pyrrole-1-butanoic acid                   | $C_9H_{11}NO_3$      | 182.0817 |          |  |
| 137 | 2-formyl-5-(hydroxymethyl)-1H-pyrrole-1-butanoic acid | $C_{10}H_{13}NO_4$   | 212.0923 |          |  |



|     |                                                      |                    |                                   |          |                                                                                       |
|-----|------------------------------------------------------|--------------------|-----------------------------------|----------|---------------------------------------------------------------------------------------|
| 138 | 2-formyl-5-(methoxymethyl)-1H-pyrrole1-butanoic acid | $C_{11}H_{15}NO_4$ | 226.1079                          |          | 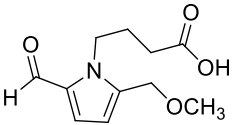   |
| 139 | Morrole A                                            | $C_{14}H_{21}NO_5$ | +Na<br>306.1317<br>+H<br>284.1498 |          |    |
| 140 | Albasins A                                           | $C_{44}H_{44}O_9$  | 717.3064                          | 715.2907 |    |
| 141 | Albasin B                                            | $C_{34}H_{28}O_8$  | 565.1862                          | 563.1706 |    |
| 142 | Albasin C                                            | $C_{24}H_{26}O_5$  | 395.1858                          | 393.1702 |   |
| 143 | Albasin D                                            | $C_{25}H_{24}O_5$  | 405.1702                          | 403.1545 |  |
| 144 | Kuwanon E                                            | $C_{25}H_{28}O_6$  | 425.1964                          | 423.1808 |  |
| 145 | Sanggenon U                                          | $C_{30}H_{38}O_7$  | 511.2696                          | 509.2539 |  |
| 146 | Sanggenon W                                          | $C_{25}H_{26}O_6$  | 422.1729                          | 420.1573 |  |
| 147 | Kuwanon S                                            | $C_{25}H_{26}O_5$  | 407.1858                          | 405.1702 |  |
| 148 | Euchrenone a7                                        | $C_{20}H_{20}O_5$  | 341.1389                          | 339.1232 |  |
| 149 | Sanggenon V                                          | $C_{25}H_{24}O_6$  | 421.1651                          | 419.1495 |  |

|     |                                                                             |                                                 |              |          |  |
|-----|-----------------------------------------------------------------------------|-------------------------------------------------|--------------|----------|--|
| 150 | (7''R)-(-)-6-(7''-Hydroxy-3'',8''-dimethyl-2'',8''-octadien-1''-yl)apigenin | C <sub>25</sub> H <sub>26</sub> O <sub>6</sub>  | 423.1808     | 421.1651 |  |
| 151 | 10-Oxomornigrol F                                                           | C <sub>25</sub> H <sub>24</sub> O <sub>7</sub>  | 437.1600     | 435.1444 |  |
| 152 | Ramumorin A                                                                 | C <sub>40</sub> H <sub>38</sub> O <sub>10</sub> | 679.2543     | 677.2387 |  |
| 153 | Ramumorin B                                                                 | C <sub>39</sub> H <sub>36</sub> O <sub>9</sub>  | 649.2438     | 647.2281 |  |
| 154 | kuwanon G                                                                   | C <sub>40</sub> H <sub>38</sub> O <sub>11</sub> | 695.2492     | 693.2336 |  |
| 155 | (4S,7S,8R)-Trihydroxyoctadeca-5Z-enoic acid                                 | C <sub>18</sub> H <sub>34</sub> O <sub>5</sub>  | 449.331.2484 | 329.2328 |  |
| 156 | β-amyrin glucopyranoside                                                    | C <sub>36</sub> H <sub>60</sub> O <sub>6</sub>  | 589.4468     | 587.4312 |  |
| 157 | 2',4',7-trihydroxyflavone                                                   | C <sub>15</sub> H <sub>12</sub> O <sub>5</sub>  | 273.0763     | 271.0606 |  |
| 158 | 3,4',5,7- tetrahydroflavone                                                 | C <sub>15</sub> H <sub>12</sub> O <sub>6</sub>  | 289.0712     | 287.0556 |  |
| 159 | 5-(5-hydroxybenzofuran-2-yl)benzen-1,3-diol                                 | C <sub>14</sub> H <sub>10</sub> O <sub>4</sub>  | 243.0567     | 241.0501 |  |
| 160 | 5-methoxymorican M                                                          | C <sub>20</sub> H <sub>18</sub> O <sub>4</sub>  | 287.0919     | 285.0763 |  |
| 161 | Norartocarpetin                                                             | C <sub>15</sub> H <sub>10</sub> O <sub>6</sub>  | 287.0556     | 285.0399 |  |
| 162 | Albanin A                                                                   | C <sub>20</sub> H <sub>18</sub> O <sub>6</sub>  | 355.1182     | 353.1025 |  |

|     |                                                                                           |                                                |          |          |  |
|-----|-------------------------------------------------------------------------------------------|------------------------------------------------|----------|----------|--|
| 163 | Isohamnetin                                                                               | C <sub>16</sub> H <sub>12</sub> O <sub>7</sub> | 317.0661 | 315.0505 |  |
| 164 | Mornigrol F                                                                               | C <sub>25</sub> H <sub>26</sub> O <sub>7</sub> | 439.1757 | 437.1600 |  |
| 165 | Cudraflavone B                                                                            | C <sub>25</sub> H <sub>24</sub> O <sub>6</sub> | 421.1651 | 419.1495 |  |
| 166 | Isoliquiritigenin                                                                         | C <sub>15</sub> H <sub>12</sub> O <sub>4</sub> | 257.0814 | 255.0657 |  |
| 167 | Mornigrol E                                                                               | C <sub>25</sub> H <sub>26</sub> O <sub>7</sub> | 439.1757 | 437.1600 |  |
| 168 | Moracin G                                                                                 | C <sub>19</sub> H <sub>16</sub> O <sub>4</sub> | 309.1127 | 307.0970 |  |
| 169 | 2,2',4,4'-tetrahydroxychalcone                                                            | C <sub>15</sub> H <sub>12</sub> O <sub>5</sub> | 273.0763 | 271.0606 |  |
| 170 | Mulberrofurane A                                                                          | C <sub>25</sub> H <sub>28</sub> O <sub>4</sub> | 393.2066 | 391.1909 |  |
| 171 | 2-(2,4-dihydroxyphenyl)-5-hydroxy-8-(hydroxymethyl)-8-methyl-3-(3-methyl-2-butenyl)-(9CI) | C <sub>25</sub> H <sub>24</sub> O <sub>7</sub> | 437.1600 | 435.1444 |  |
| 172 | 3-methoxyquercetin                                                                        | C <sub>16</sub> H <sub>12</sub> O <sub>7</sub> | 317.0661 | 315.0505 |  |
| 173 | Norartocarpanone                                                                          | C <sub>15</sub> H <sub>12</sub> O <sub>6</sub> | 289.0712 | 287.0556 |  |
| 174 | 5-methoxymorican M                                                                        | C <sub>16</sub> H <sub>14</sub> O <sub>5</sub> | 287.0919 | 285.0763 |  |

|     |                                        |                                                |          |          |                                                                                       |
|-----|----------------------------------------|------------------------------------------------|----------|----------|---------------------------------------------------------------------------------------|
| 175 | Mulberranol                            | C <sub>25</sub> H <sub>26</sub> O <sub>7</sub> | 439.1757 | 437.1600 | 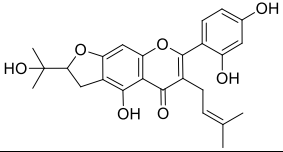   |
| 176 | p-hydroxybenzaldehyde                  | C <sub>7</sub> H <sub>6</sub> O <sub>2</sub>   | 123.0446 | 121.0290 |    |
| 177 | p-hydroxyphenol                        | C <sub>6</sub> H <sub>6</sub> O <sub>2</sub>   | 111.0446 | 109.0290 |    |
| 178 | p-coumaric acid                        | C <sub>9</sub> H <sub>8</sub> O <sub>3</sub>   | 165.0552 | 163.0395 |    |
| 179 | 2',3,4',5,5'-pentahydroxy-cis-stilbene | C <sub>14</sub> H <sub>12</sub> O <sub>3</sub> | 229.0865 | 227.0708 |    |
| 180 | Cudraflavone A                         | C <sub>25</sub> H <sub>22</sub> O <sub>6</sub> | 419.1495 | 417.1338 |   |
| 181 | Albafuran C                            | C <sub>34</sub> H <sub>28</sub> O <sub>9</sub> | 581.1812 | 579.1655 |  |
| 182 | Mulberrofuran G                        | C <sub>34</sub> H <sub>26</sub> O <sub>8</sub> | 563.1706 | 561.1549 |  |
| 183 | Uvaol                                  | C <sub>30</sub> H <sub>50</sub> O <sub>2</sub> | 443.3889 | 441.3733 |  |
| 184 | Guangsangon A                          | C <sub>41</sub> H <sub>42</sub> O <sub>9</sub> | 679.2907 | 677.2751 |  |
| 185 | Kuwanon P                              | C <sub>34</sub> H <sub>30</sub> O <sub>9</sub> | 583.1968 | 581.1812 |  |
| 186 | Guangsangon B                          | C <sub>34</sub> H <sub>30</sub> O <sub>8</sub> | 567.2019 | 565.1862 |  |

|     |                                                     |                      |          |          |                                                                                       |
|-----|-----------------------------------------------------|----------------------|----------|----------|---------------------------------------------------------------------------------------|
| 187 | Kuwanon X                                           | $C_{34}H_{30}O_9$    | 583.1968 | 581.1812 | 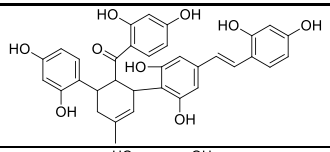   |
| 188 | Guangsangon C                                       | $C_{35}H_{30}O_{10}$ | 611.1917 | 609.1761 |    |
| 189 | Guangsangon D                                       | $C_{35}H_{30}O_{10}$ | 611.1917 | 609.1761 |    |
| 190 | Guangsangon E                                       | $C_{39}H_{36}O_9$    | 649.2438 | 647.2281 |    |
| 191 | 6,7-dimethylesculetin                               | $C_{11}H_{10}O_4$    | 207.0657 | 205.0501 |    |
| 192 | 2',4'-dihydroxy-7'-methoxy-8-prenylflavan           | $C_{21}H_{24}O_4$    | 341.1753 | 339.1596 |   |
| 193 | 4-hydroxybenzaldehyde                               | $C_7H_6O_2$          | 123.0446 | 121.0290 |  |
| 194 | (+)-demethoxypinoresinol                            | $C_{19}H_{20}O_5$    | 329.1389 | 327.1232 |  |
| 195 | (+)-pinoresinol                                     | $C_{20}H_{22}O_6$    | 359.1495 | 357.1338 |  |
| 196 | Umbellic acid                                       | $C_9H_8O_4$          | 181.0501 | 179.0344 |  |
| 197 | Linoleic acid                                       | $C_{18}H_{32}O_2$    | 281.2481 | 279.2324 |  |
| 198 | Methyl linoleate                                    | $C_{19}H_{34}O_2$    | 295.2637 | 293.2481 |  |
| 199 | (9S, 10E, 12E)-9-hydroxy-10,12-octadecadienoic acid | $C_{19}H_{34}O_3$    | 311.2586 | 309.2430 |  |
| 200 | N-(N-benzoyl-L-phenylalanyl-L-phenylalanol          | $C_{25}H_{26}N_2O_3$ | 403.2022 | 401.1865 |  |

|     |                                                   |                                                 |          |          |                                                                                       |
|-----|---------------------------------------------------|-------------------------------------------------|----------|----------|---------------------------------------------------------------------------------------|
| 201 | Isomoracin D                                      | C <sub>20</sub> H <sub>18</sub> O <sub>4</sub>  | 323.1283 | 321.1127 | 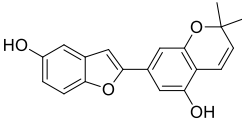   |
| 202 | Sanggenol O                                       | C <sub>25</sub> H <sub>24</sub> O <sub>6</sub>  | 421.1651 | 419.1495 |    |
| 203 | 2,3-trans-dihydromorin                            | C <sub>15</sub> H <sub>12</sub> O <sub>7</sub>  | 305.0661 | 303.0505 |    |
| 204 | Sanggenon J                                       | C <sub>25</sub> H <sub>26</sub> O <sub>6</sub>  | 423.1808 | 421.1651 |    |
| 205 | Sanggenon F                                       | C <sub>20</sub> H <sub>18</sub> O <sub>6</sub>  | 355.1182 | 353.1025 |    |
| 206 | 3'-Geranyl-3-prenyl-2',4',5,7-tetrahydroxyflavone | C <sub>30</sub> H <sub>34</sub> O <sub>6</sub>  | 491.2434 | 489.2277 |   |
| 207 | Kuwanon J                                         | C <sub>35</sub> H <sub>30</sub> O <sub>11</sub> | 627.1861 | 625.1710 |  |
| 208 | Kuwanon A                                         | C <sub>25</sub> H <sub>24</sub> O <sub>6</sub>  | 421.1651 | 419.1495 |  |
| 209 | Kuwanon B                                         | C <sub>25</sub> H <sub>24</sub> O <sub>6</sub>  | 421.1651 | 419.1495 |  |
| 210 | Kuwanol A                                         | C <sub>34</sub> H <sub>28</sub> O <sub>8</sub>  | 565.1862 | 563.1706 |  |

Table S2 The blood glucose level (mmol/L) of experimental mice.

| Groups        | 0 Days         | 7 Days                    | 14 Days                   | 21 Days                   | 28 Days                    |
|---------------|----------------|---------------------------|---------------------------|---------------------------|----------------------------|
| NC            | 5.37 ± 0.57    | 5.34 ± 0.93               | 5.56 ± 0.45               | 5.23 ± 0.50               | 5.28 ± 0.74                |
| MC            | 32.38 ± 1.87** | 32.19 ± 1.68**            | 32.56 ± 1.94**            | 33.12 ± 1.88**            | 33.23 ± 1.28**             |
| Acarbose (AB) | 33.08 ± 0.56   | 24.12 ± 0.79 <sup>#</sup> | 24.56 ± 0.43 <sup>#</sup> | 23.78 ± 0.78 <sup>#</sup> | 22.21 ± 0.73 <sup>#</sup>  |
| Morusin (MS)  | 31.45 ± 1.23   | 28.12 ± 0.95              | 27.45 ± 2.13              | 25.78 ± 1.95              | 23.45 ± 2.13 <sup>#</sup>  |
| RM            | 32.08 ± 1.27   | 27.26 ± 0.47              | 25.12 ± 0.97 <sup>#</sup> | 22.21 ± 2.03 <sup>#</sup> | 20.88 ± 1.82 <sup>##</sup> |
| LM            | 31.17 ± 0.78   | 28.46 ± 0.12              | 28.67 ± 0.45              | 28.12 ± 0.67              | 27.33 ± 1.34               |
| TM            | 33.32 ± 1.98   | 26.34 ± 1.21              | 26.45 ± 1.01              | 26.34 ± 1.45              | 24.74 ± 1.02 <sup>#</sup>  |
| FM            | 32.08 ± 1.07   | 29.12 ± 1.11              | 29.45 ± 1.78              | 30.21 ± 1.56              | 30.45 ± 1.89               |

\*\* p < 0.01 compared with the normal control group on the same days. # p < 0.05, ## p < 0.01 compared with the data at the 0-days; NC: normal group; MC: model group; AB: acarbose group (positive control, 50 mg/kg); MS: morusin group (50 mg/kg); RM: roots of *M. alba* group (200 mg/kg); LM: leaves of *M. alba* group (200 mg/kg); TM: twigs of *M. alba* group (200 mg/kg); FM: fruits of *M. alba* group (200 mg/kg).

Table S3 The body weight (g) of experimental mice

| Group         | Weight (g)   |              |              |                           |                            |
|---------------|--------------|--------------|--------------|---------------------------|----------------------------|
|               | 0 Days       | 7 Days       | 14 Days      | 21 Days                   | 28 Days                    |
| NC            | 36.17 ± 1.21 | 38.25 ± 1.53 | 40.34 ± 1.23 | 45.32 ± 2.46 <sup>#</sup> | 55.23 ± 1.26 <sup>##</sup> |
| MC            | 40.34 ± 4.21 | 43.25 ± 4.32 | 40.23 ± 3.22 | 36.11 ± 3.34**            | 32.22 ± 2.44**             |
| Acarbose (AB) | 40.29 ± 1.11 | 40.12 ± 1.34 | 41.23 ± 1.67 | 42.34 ± 1.65              | 42.64 ± 1.43               |
| Morusin (MS)  | 38.25 ± 2.67 | 38.23 ± 3.23 | 38.34 ± 4.01 | 38.67 ± 3.45              | 39.44 ± 3.67               |
| RM            | 35.23 ± 1.44 | 36.23 ± 1.45 | 37.34 ± 1.07 | 39.23 ± 1.47              | 45.12 ± 1.45 <sup>#</sup>  |
| LM            | 36.21 ± 3.45 | 37.34 ± 3.27 | 37.89 ± 3.07 | 38.23 ± 2.88              | 38.56 ± 3.53               |
| TM            | 35.34 ± 3.09 | 36.32 ± 3.27 | 37.23 ± 3.07 | 38.12 ± 2.88              | 39.44 ± 3.53               |
| FM            | 36.70 ± 1.07 | 36.34 ± 1.27 | 36.67 ± 1.07 | 35.12 ± 1.88              | 34.01 ± 1.53               |

\*\* p < 0.01 compared with the normal control group on the same days. # p < 0.05, ## p < 0.01 compared with the data at the 0-days; NC: normal group; MC: model group; AB: acarbose group (positive control, 50 mg/kg); MS: morusin group (50 mg/kg); RM: roots of *M. alba* group (200 mg/kg); LM: leaves of *M. alba* group (200 mg/kg); TM: twigs of *M. alba* group (200 mg/kg); FM: fruits of *M. alba* group (200 mg/kg).

Table S4 The postprandial glycemia (mmol/L) of the normal mice.

| Time (min) | blood glucose (mmol/L) |               |              |               |
|------------|------------------------|---------------|--------------|---------------|
|            | NC                     | Acarbose (AB) | RM           | TM            |
| 0          | 4.28 ± 0.89            | 4.21 ± 1.21   | 4.07 ± 0.23  | 4.45 ± 0.28   |
| 30         | 13.21 ± 1.11           | 10.34 ± 0.23* | 9.01 ± 0.47* | 10.25 ± 1.11* |
| 60         | 10.89 ± 1.23           | 9.45 ± 0.89   | 8.00 ± 0.35  | 9.12 ± 0.78   |
| 90         | 8.21 ± 0.67            | 8.45 ± 0.76   | 7.67 ± 0.67  | 8.12 ± 0.35   |
| 120        | 6.34 ± 0.54            | 6.78 ± 0.93   | 6.21 ± 0.34  | 6.33 ± 0.65   |

\*  $p < 0.05$  compared with the normal control group (NC). NC: normal group; AB: acarbose group (positive control, 50 mg/kg); RM: roots of *M. alba* group (200 mg/kg); TM: twigs of *M. alba* group (200 mg/kg).

Table S5 Trial groups, number of mice and dose design of anti-diabetic experiment.

| Group                       | Number of Mice | Dose<br>(mg/kg) |
|-----------------------------|----------------|-----------------|
| Normal control (NC)         | 10             | --              |
| Model control (MC)          | 10             | --              |
| Positive control (Acarbose) | 10             | 50              |
| Morusin                     | 10             | 50              |
| RM                          | 10             | 200             |
| LM                          | 10             | 200             |
| TM                          | 10             | 200             |
| FM                          | 10             | 200             |
